# Supplementary material
Source: PubMed Central journal article supplement (PMC7100716)
Supplement: NIHMS1548658-supplement-2.pdf [file NIHMS1548658-supplement-2.pdf]

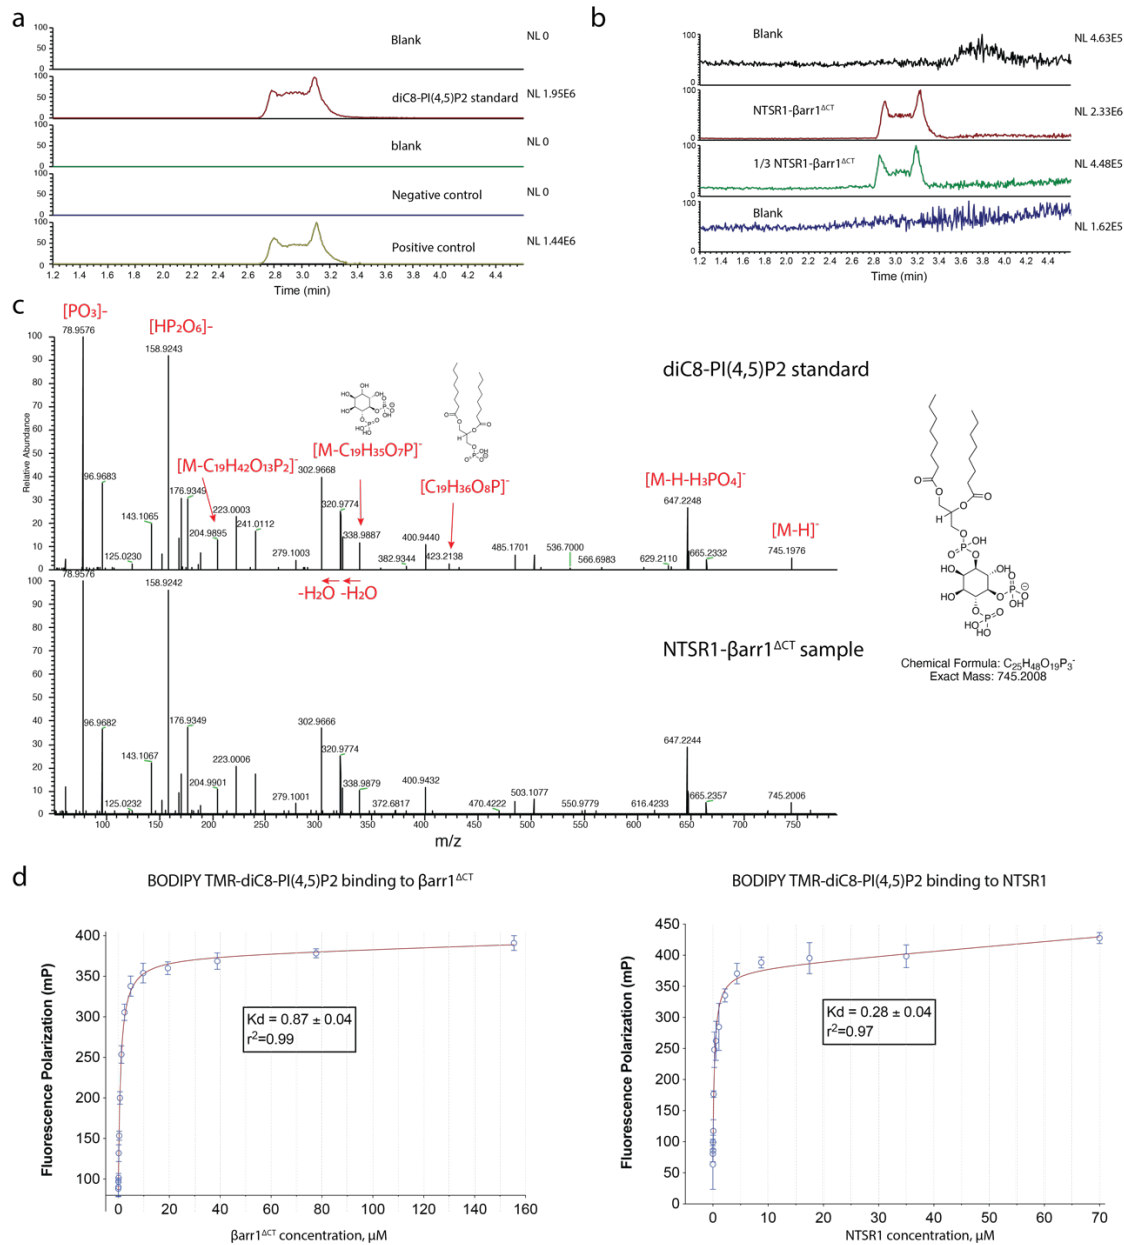

### Supplementary Figure 1: NTSR1-βarr1<sup>ACT</sup> complex samples contain diC8-PI(4,5)P2.

**a)** Extracted ion chromatogram (EIC) for diC8-PI(4,5)P2 745.2052 ± 5 ppm. Vertical axes are scaled individually for each run. Samples are listed top to bottom representing the order in which they were run. 1 μM diC8-PI(4,5)P2 was used for the standard run. Two samples were prepared where an equimolar mixture of NTSR1 and βarr1<sup>ACT</sup> were combined in cryoEM SEC buffer to a final concentration of 1 μM each. To one sample (positive control) diC8-PI(4,5)P2 was added to 1 μM, and to the other sample buffer alone was added (negative control). These data show that intact diC8-PI(4,5)P2 can be measured in a protein-containing sample. Experiments were performed independently twice, with similar results. **b)** EICs for diC8-PI(4,5)P2

745.2052  $\pm$  5 ppm show that a protein sample used for cryoEM, for which diC8-PI(4,5)P2 was not added during the complexing step, contains diC8-PI(4,5)P2. This experiment was performed independently once on a single cryoEM preparation. **c)** MS2 spectra of isolated 745.2069 m/z species, fragmented by HCD at 30 eV, observed in both diC8-PI(4,5)P2 standard and NTSR1- $\beta$ arr1<sup>ACT</sup> complex samples. Diagnostic fragment ions for diC8-PI(4,5)P2 are observed in both spectra and plausible chemical identities are annotated (only on top spectrum). Experiments were performed independently twice, with similar results. **d)** Fluorescence anisotropy measurements using BODIPY TMR-labeled PI(4,5)P2 show micromolar binding affinities for both  $\beta$ arr1<sup>ACT</sup> (left panel) and NTSR1 (right panel). Values are shown as mean  $\pm$  SD; n=3 technical replicates. Experiments were each performed independently once.

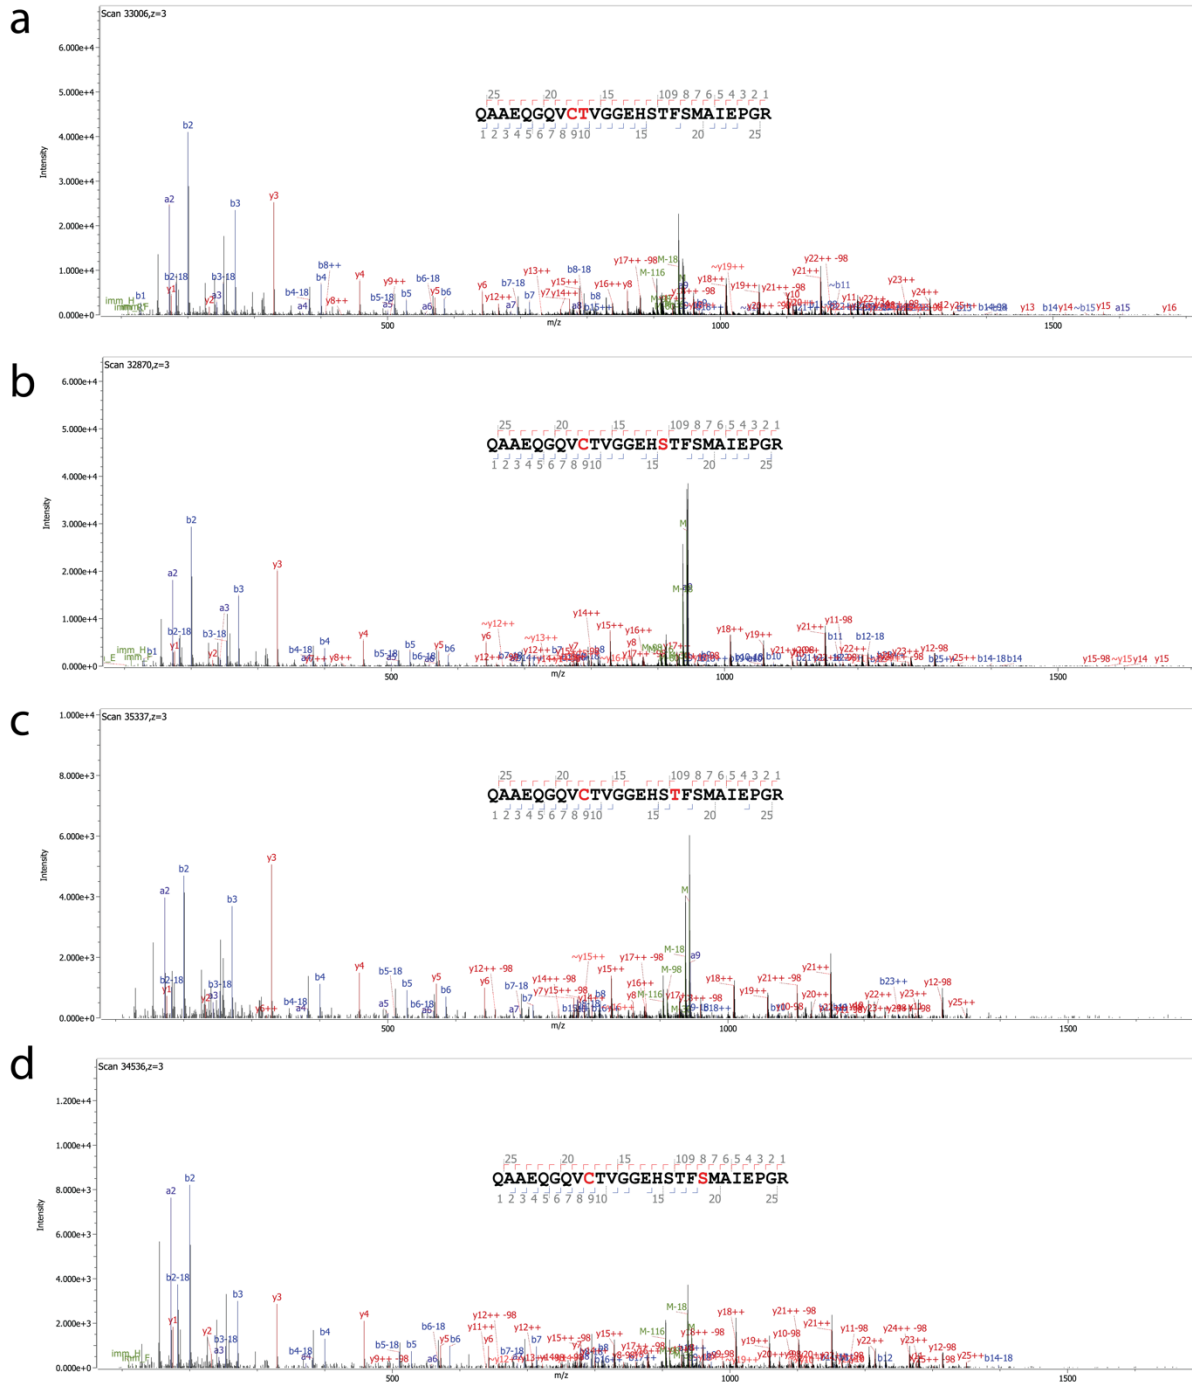

**Supplementary Figure 2: Spectra used for assignment of the GRK5 phosphosites in NTSR1.**

**a)** Representative MS2 [PASEF(943.0842)] of QAAEQGQVC(carbamidomethyl)T(phospho)VGGEHSTFSMAIEPGR bearing pT278. **b)** Representative MS2 [PASEF(943.0842)] of QAAEQGQVC(carbamidomethyl)TVGGEHS(phospho)TFSMAIEPGR

bearing pS284. **c)** Representative MS2 [PASEF(943.0842)] of

QAAEQGQVC(carbamidomethyl)TVGGEHST(phospho)FSMAIEPGR bearing pT285. **d)** Representative MS2 [PASEF(943.0842)]

bearing pT285.

of QAAEQGQVC(carbamidomethyl)TVGGEHSTFS(phospho)MAIEPGR bearing pS287. These are representative spectra from experiments that were performed independently twice, and analyzed by two or three technical replicates each time, all with similar results. PASEF stands for Parallel Accumulation-Serial Fragmentation and is the designation used for scans from the Bruker timsTOF Pro; eg. PASEF(x) denotes the MS2 scan recorded for species x. y ions are denoted by red markings, a and b ions by blue markings and other ions (including neutral loss) by green markings. The “~” denotes the fragment ion after loss of all labile modifications. The red letters in the peptide sequence denote modified residues. Numbering above and below are the numbering of the corresponding y and b/a ions. The charge of the isolated ion is shown in the top left corner.

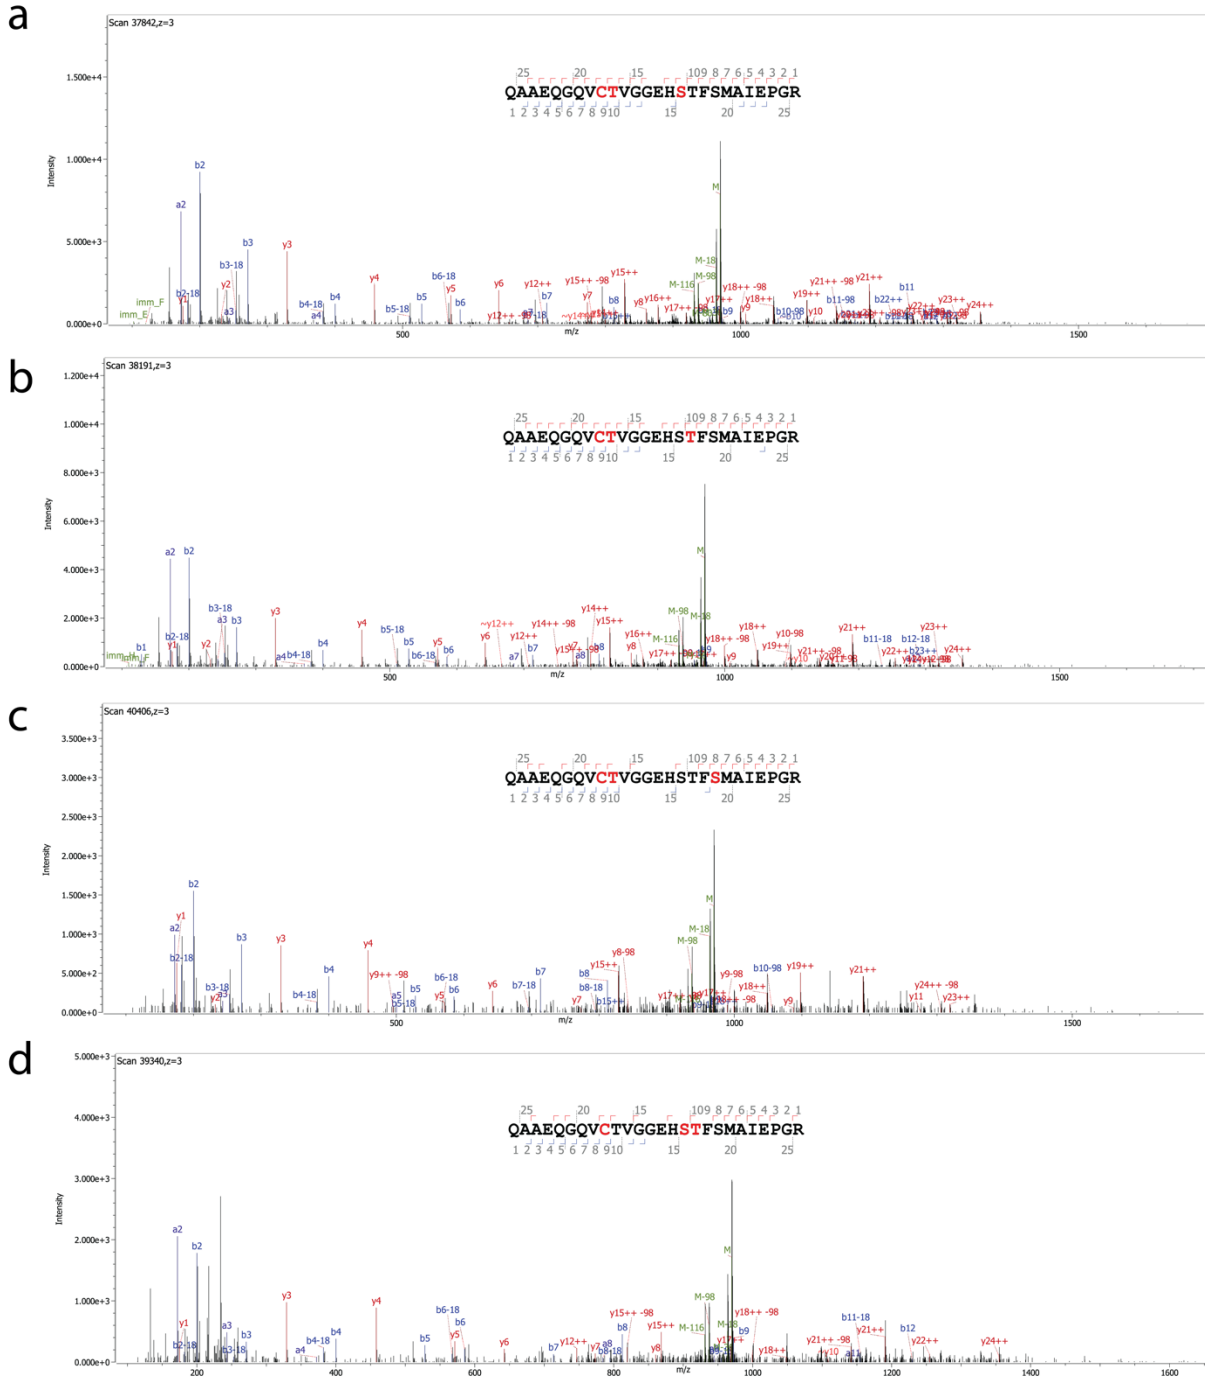

**Supplementary Figure 3: Spectra (continued) used for assignment of the GRK5 phosphosites in NTSR1.**

**a)** Representative MS2 [PASEF(969.7328)] of QAAEQGQVC(carbamidomethyl)T(phospho)VGGEHS(phospho)TFMSAIEPGR bearing pT278 and pS284. **b)** Representative MS2 [PASEF(969.7328)] of QAAEQGQVC(carbamidomethyl)T(phospho)VGGEHST(phospho)FSMAIEPGR bearing pT278 and pS285. **c)** Representative

MS2 [PASEF(969.7328)] of QAAEQGQVC(carbamidomethyl)T(phospho)VGGEHSTFS(phospho)MAIEPGR bearing pT278 and pS287. **d)** Representative MS2 [PASEF(969.7328)] of QAAEQGQVC(carbamidomethyl)TVGGEHS(phospho)T(phospho)FSMAIEPGR bearing pS284 and pT285. These are representative spectra from experiments that were performed independently twice, and analyzed by two or three technical replicates each time, all with similar results. PASEF stands for Parallel Accumulation-Serial Fragmentation and is the designation used for scans from the Bruker timsTOF Pro; eg. PASEF(x) denotes the MS2 scan recorded for species x. y ions are denoted by red markings, a and b ions by blue markings and other ions (including neutral loss) by green markings. The “~” denotes the fragment ion after loss of all labile modifications. The red letters in the peptide sequence denote modified residues. Numbering above and below are the numbering of the corresponding y and b/a ions. The charge of the isolated ion is shown in the top left corner.

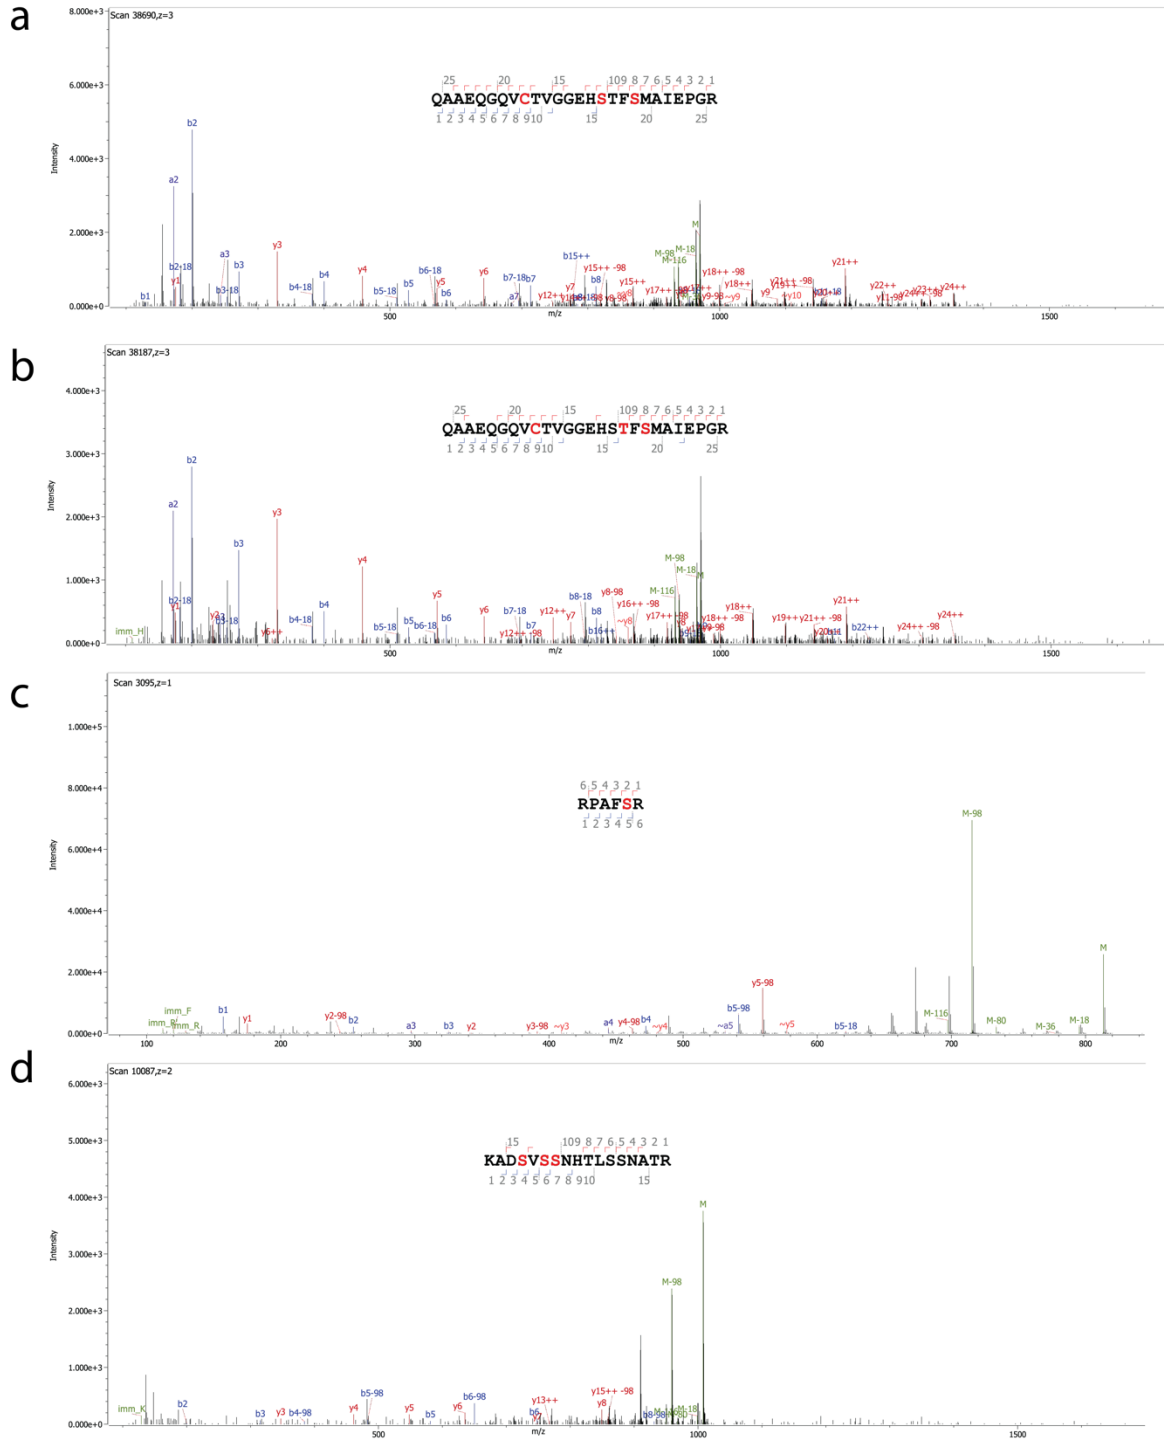

**Supplementary Figure 4: Spectra (continued) used for assignment of the GRK5 phosphosites in NTSR1.**

**a)** Representative MS2 [PASEF(969.7328)] of QAAEQQVC(carbamidomethyl)TVGGEHS(phospho)TFS(phospho)MAIEPGR bearing pS284 and pS287. **b)** Representative MS2 [PASEF(969.7328)] of QAAEQQVC(carbamidomethyl)TVGGEHST(phospho)FS(phospho)MAIEPGR bearing pT285 and pS287. **c)** Representative

MS2 [PASEF(813.3849)] of RPAFS(phospho)R bearing pS396. **d)** Representative MS2 [PASEF(969.7328)] of KADS(Phospho)VS(Phospho)S(Phospho)NHTLSSNATR bearing pS401, pS403 and pS404. These are representative spectra from experiments that were performed independently twice, and analyzed by two or three technical replicates each time, all with similar results. PASEF stands for Parallel Accumulation-Serial Fragmentation and is the designation used for scans from the Bruker timsTOF Pro; eg. PASEF(x) denotes the MS2 scan recorded for species x. y ions are denoted by red markings, a and b ions by blue markings and other ions (including neutral loss) by green markings. The “~” denotes the fragment ion after loss of all labile modifications. The red letters in the peptide sequence denote modified residues. Numbering above and below are the numbering of the corresponding y and b/a ions. The charge of the isolated ion is shown in the top left corner.



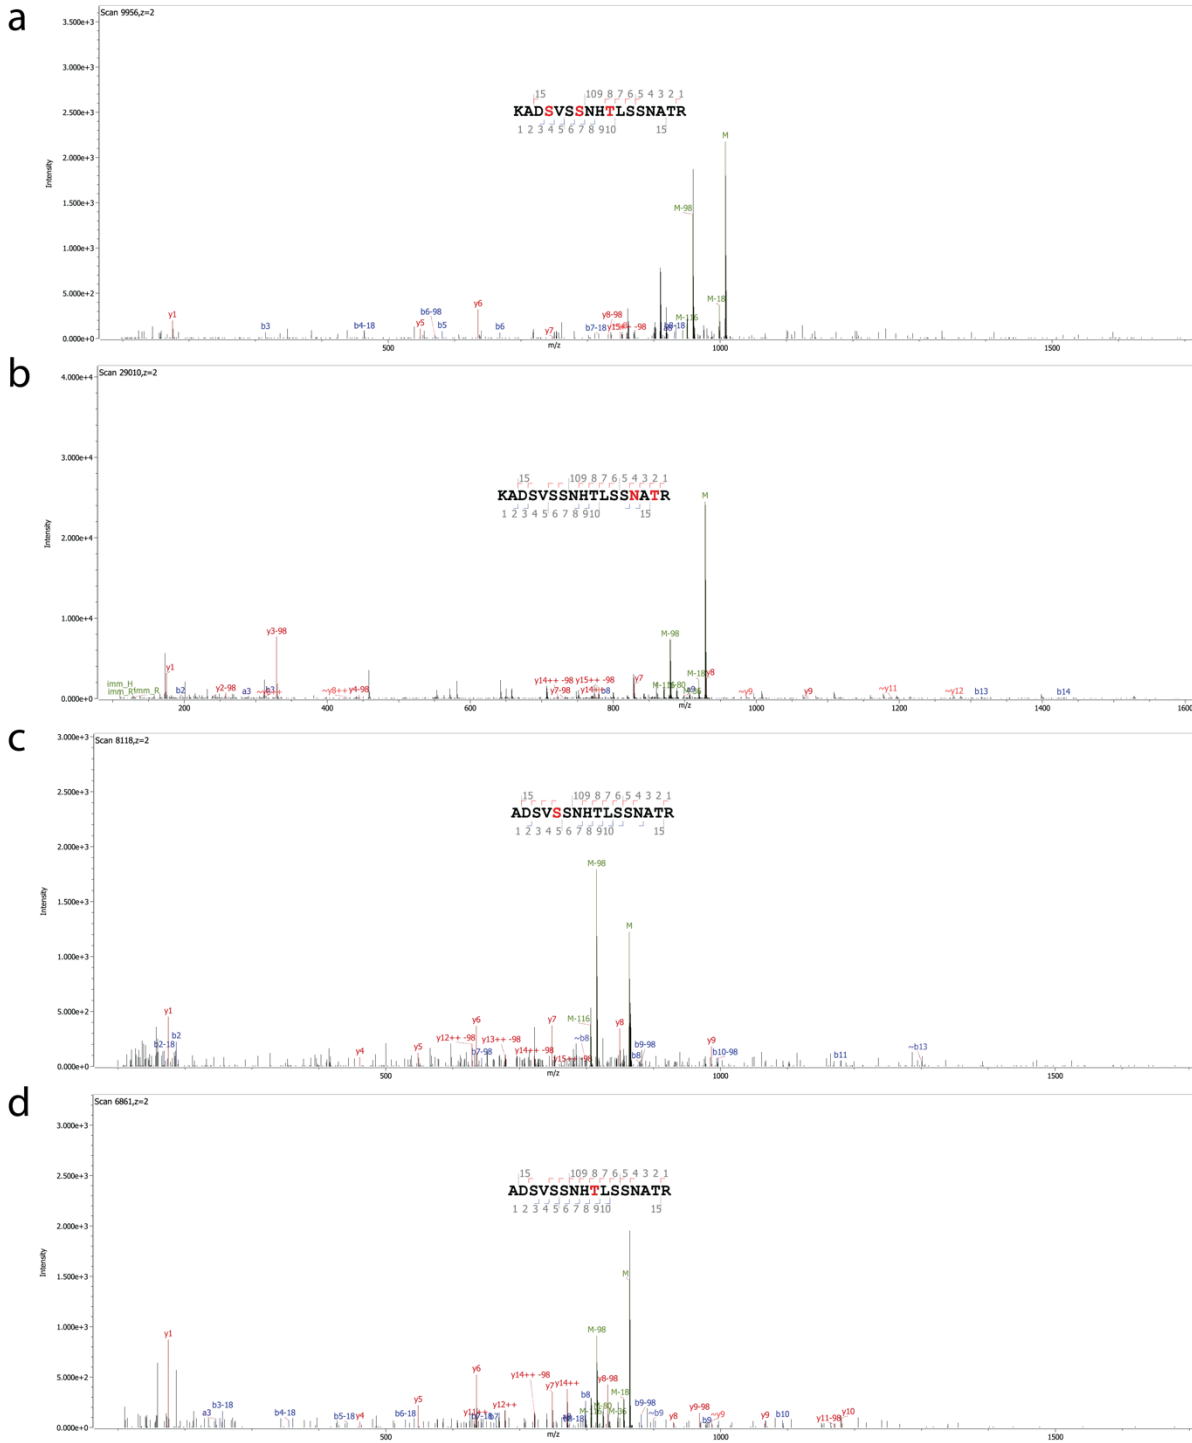

**Supplementary Figure 5: Spectra (continued) used for assignment of the GRK5 phosphosites in NTSR1.**

**a)** Representative MS2 [PASEF(1008.4042)] of KADS(Phospho)VSS(Phospho)NHT(Phospho)LSSNATR bearing pS401, pS404, pT407. **b)** Representative MS2 [PASEF(928.9199)] of KADSVSSNHTLSSNAT(Phospho)R bearing pS416. **c)** Representative MS2 [PASEF(863.8839)] of ADSVS(Phospho)SNHTLSSNATR bearing pS403. **d)** Representative MS2 [PASEF(863.8853)] of

ADSVSSNHT(Phospho)LSSNATR bearing pT407. These are representative spectra from experiments that were performed independently twice, and analyzed by two or three technical replicates each time, all with similar results. PASEF stands for Parallel Accumulation-Serial Fragmentation and is the designation used for scans from the Bruker timsTOF Pro; eg. PASEF(x) denotes the MS2 scan recorded for species x. y ions are denoted by red markings, a and b ions by blue markings and other ions (including neutral loss) by green markings. The “~” denotes the fragment ion after loss of all labile modifications. The red letters in the peptide sequence denote modified residues. Numbering above and below are the numbering of the corresponding y and b/a ions. The charge of the isolated ion is shown in the top left corner.

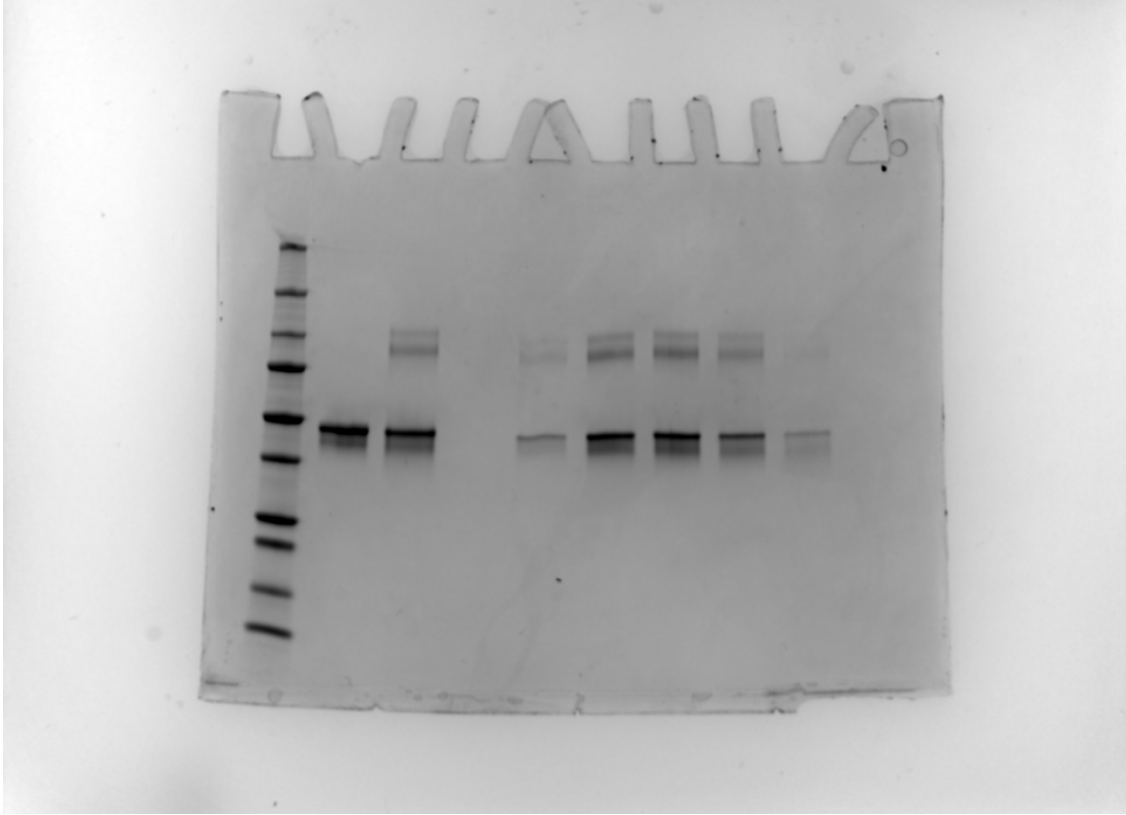

**Supplementary Figure 6: Uncropped gel from Extended Data Figure 3b.**

Full scan of SDS-PAGE gel shown in Extended Data Figure 3b. Lanes from left to right are: molecular weight markers, pre-crosslinked NTSR1- $\beta$ arr1<sup>ACT</sup> complex, post-UV illumination (crosslinked) NTSR1- $\beta$ arr1<sup>ACT</sup> complex, empty lane, then five fractions from the SEC run post-UV illumination beginning with the earliest elution volume.

| $\beta$ arr1 <sup>ACT</sup> |                     |       |            |          |              |               | NTSR1             |                     |       |            |          |              |               |
|-----------------------------|---------------------|-------|------------|----------|--------------|---------------|-------------------|---------------------|-------|------------|----------|--------------|---------------|
| Uniprot numbering           | Construct numbering | Obs'd | %mod       | Dead-end | xlink (self) | xlink (other) | Uniprot numbering | Construct numbering | Obs'd | %mod       | Dead-end | xlink (self) | xlink (other) |
| N/A                         | 14                  | 16    | 12.5       | 0        | 1            | 1             | N/A               | 3                   | 0     | ND         | 0        | 0            | 0             |
| Lys4                        | 28                  | 34    | 26.4705882 | 3        | 3            | 3             | Lys63             | 86                  | 16    | 0          | 0        | 0            | 0             |
| Lys10                       | 34                  | 9     | 22.2222222 | 0        | 1            | 1             | Lys91             | 114                 | 0     | ND         | 0        | 0            | 0             |
| Lys11                       | 35                  | 3     | 0          | 0        | 0            | 0             | Lys92             | 115                 | 0     | ND         | 0        | 0            | 0             |
| Lys17                       | 41                  | 34    | 100        | 11       | 22           | 6             | Lys175            | 198                 | 23    | 52.173913  | 3        | 6            | 3             |
| Lys24                       | 48                  | 38    | 60.5263158 | 1        | 19           | 3             | Lys177            | 200                 | 17    | 76.4705882 | 5        | 4            | 4             |
| Lys49                       | 73                  | 0     | ND         | 0        | 0            | 0             | Lys186            | 209                 | 4     | 100        | 0        | 1            | 3             |
| Lys77                       | 101                 | 38    | 65.7894737 | 13       | 12           | 0             | Lys187            | 210                 | 1     | 100        | 1        | 0            | 0             |
| Lys94                       | 118                 | 92    | 13.0434783 | 0        | 12           | 0             | Lys234            | 257                 | 12    | 0          | 0        | 0            | 0             |
| Lys95                       | 119                 | 15    | 0          | 0        | 0            | 0             | Lys262            | 285                 | 0     | ND         | 0        | 0            | 0             |
| Lys106                      | 130                 | 2     | 100        | 2        | 0            | 0             | Lys391            | 414                 | 80    | 25         | 16       | 2            | 2             |
| Lys107                      | 131                 | 3     | 0          | 0        | 0            | 0             | Lys398            | 421                 | 7     | 0          | 0        | 0            | 0             |
| Lys138                      | 162                 | 3     | 0          | 0        | 0            | 0             |                   |                     |       |            |          |              |               |
| Lys147                      | 171                 | 7     | 0          | 0        | 0            | 0             |                   |                     |       |            |          |              |               |
| Lys157                      | 181                 | 30    | 83.3333333 | 5        | 16           | 4             |                   |                     |       |            |          |              |               |
| Lys160                      | 184                 | 18    | 72.2222222 | 1        | 12           | 0             |                   |                     |       |            |          |              |               |
| Lys170                      | 194                 | 12    | 0          | 0        | 0            | 0             |                   |                     |       |            |          |              |               |
| Lys195                      | 219                 | 34    | 52.9411765 | 10       | 4            | 4             |                   |                     |       |            |          |              |               |
| Lys205                      | 229                 | 19    | 0          | 0        | 0            | 0             |                   |                     |       |            |          |              |               |
| Lys226                      | 250                 | 9     | 44.4444444 | 0        | 2            | 2             |                   |                     |       |            |          |              |               |
| Lys229                      | 253                 | 3     | 66.6666667 | 0        | 1            | 1             |                   |                     |       |            |          |              |               |
| Lys230                      | 254                 | 1     | 0          | 0        | 0            | 0             |                   |                     |       |            |          |              |               |
| Lys232                      | 256                 | 5     | 100        | 3        | 2            | 2             |                   |                     |       |            |          |              |               |
| Lys250                      | 274                 | 7     | 0          | 0        | 0            | 0             |                   |                     |       |            |          |              |               |
| Lys270                      | 294                 | 22    |            | 0        | 0            | 0             |                   |                     |       |            |          |              |               |
| Lys284                      | 308                 | 0     | ND         | 0        | 0            | 0             |                   |                     |       |            |          |              |               |
| Lys292                      | 316                 | 9     | 33.3333333 | 1        | 2            | 0             |                   |                     |       |            |          |              |               |
| Lys294                      | 318                 | 6     | 83.3333333 | 3        | 2            | 0             |                   |                     |       |            |          |              |               |
| Lys322                      | 346                 | 5     | 0          | 0        | 0            | 0             |                   |                     |       |            |          |              |               |
| Lys324                      | 348                 | 0     | ND         | 0        | 0            | 0             |                   |                     |       |            |          |              |               |
| Lys326                      | 350                 | 2     | 100        | 2        | 0            | 0             |                   |                     |       |            |          |              |               |
| Lys355                      | 379                 | 2     | 0          | 0        | 0            | 0             |                   |                     |       |            |          |              |               |
| Lys357                      | 381                 | 4     | 50         | 2        | 0            | 0             |                   |                     |       |            |          |              |               |

**Supplementary Table 1: NTSR1- $\beta$ arr1<sup>ACT</sup> complex sample, SDS-PAGE band 1.**

Obs'd denotes the number of times that residue is covered within the MS data. %mod denotes the fraction of times that residue is modified out of the total number of times it is observed. Dead-end denotes the number of times the residue is modified by a dead-end crosslinker. Xlink (self) denotes the number of times that the peptide bearing this residue is modified by a crosslinker which intramolecularly crosslinks the peptide. Xlink (other) denotes the number of times that the peptide bearing this residue is crosslinked to another peptide. N/A for Uniprot number is used when the reactive residue is not part

of the natural protein sequence. ND (not determined) is used when there are no observations of the given residue. Construct numbering denotes the residue number in the context of the construct used in this study.

| $\beta$ arr1 <sup>ACT</sup> |                     |       |            |          |              |               | NTSR1             |                     |       |            |          |              |               |
|-----------------------------|---------------------|-------|------------|----------|--------------|---------------|-------------------|---------------------|-------|------------|----------|--------------|---------------|
| Uniprot numbering           | Construct numbering | Obs'd | %mod       | Dead-end | xlink (self) | xlink (other) | Uniprot numbering | Construct numbering | Obs'd | %mod       | Dead-end | xlink (self) | xlink (other) |
| N/A                         | 14                  | 44    | 45.4545455 | 13       | 6            | 1             | N/A               | 3                   | 0     | ND         |          |              |               |
| Lys4                        | 28                  | 114   | 15.7894737 | 8        | 5            | 5             | Lys63             | 86                  | 14    | 0          | 0        | 0            | 0             |
| Lys10                       | 34                  | 2     | 100        | 0        |              | 2             | Lys91             | 114                 | 0     | ND         |          |              |               |
| Lys11                       | 35                  | 17    | 11.7647059 | 0        |              | 2             | Lys92             | 115                 | 0     | ND         |          |              |               |
| Lys17                       | 41                  | 58    | 100        | 25       |              | 33            | Lys175            | 198                 | 13    | 30.7692308 | 3        | 1            | 0             |
| Lys24                       | 48                  | 72    | 45.8333333 | 1        | 32           | 0             | Lys177            | 200                 | 6     | 50         | 2        | 1            | 0             |
| Lys49                       | 73                  | 15    | 0          | 0        | 0            | 0             | Lys186            | 209                 | 0     | ND         |          |              |               |
| Lys77                       | 101                 | 99    | 51.5151515 | 24       | 27           | 0             | Lys187            | 210                 | 0     | ND         |          |              |               |
| Lys94                       | 118                 | 192   | 16.1458333 | 4        | 27           | 0             | Lys234            | 257                 | 9     | 0          |          |              |               |
| Lys95                       | 119                 | 81    | 11.1111111 | 4        | 5            | 0             | Lys262            | 285                 | 0     | ND         |          |              |               |
| Lys106                      | 130                 | 4     | 100        | 2        | 1            | 1             | Lys391            | 414                 | 44    | 29.5454545 | 13       |              |               |
| Lys107                      | 131                 | 26    | 11.5384615 | 1        | 1            | 1             | Lys398            | 421                 | 0     | ND         |          |              |               |
| Lys138                      | 162                 | 53    | 0          | 0        | 0            | 0             |                   |                     |       |            |          |              |               |
| Lys147                      | 171                 | 35    | 11.4285714 | 1        | 3            | 0             |                   |                     |       |            |          |              |               |
| Lys157                      | 181                 | 84    | 54.7619048 | 15       | 31           | 0             |                   |                     |       |            |          |              |               |
| Lys160                      | 184                 | 46    | 67.3913043 | 0        | 31           | 0             |                   |                     |       |            |          |              |               |
| Lys170                      | 194                 | 23    | 17.3913043 |          | 2            | 2             |                   |                     |       |            |          |              |               |
| Lys195                      | 219                 | 17    | 0          | 0        | 0            | 0             |                   |                     |       |            |          |              |               |
| Lys205                      | 229                 | 16    | 0          | 0        | 0            | 0             |                   |                     |       |            |          |              |               |
| Lys226                      | 250                 | 14    | 14.2857143 | 2        | 0            | 0             |                   |                     |       |            |          |              |               |
| Lys229                      | 253                 | 2     | 0          | 0        | 0            | 0             |                   |                     |       |            |          |              |               |
| Lys230                      | 254                 | 5     | 20         | 0        | 1            | 0             |                   |                     |       |            |          |              |               |
| Lys232                      | 256                 | 11    | 81.8181818 | 8        | 1            | 0             |                   |                     |       |            |          |              |               |
| Lys250                      | 274                 | 30    | 3.33333333 | 1        | 0            | 0             |                   |                     |       |            |          |              |               |
| Lys270                      | 294                 | 97    | 2.06185567 | 2        | 0            | 0             |                   |                     |       |            |          |              |               |
| Lys284                      | 308                 | 7     | ND         | 0        | 0            | 0             |                   |                     |       |            |          |              |               |
| Lys292                      | 316                 | 20    | 70         | 3        | 11           | 0             |                   |                     |       |            |          |              |               |
| Lys294                      | 318                 | 22    | 68.1818182 | 3        | 11           | 1             |                   |                     |       |            |          |              |               |
| Lys322                      | 346                 | 21    | 0          | 1        | 1            | 1             |                   |                     |       |            |          |              |               |
| Lys324                      | 348                 | 2     | 50         | 1        | 0            | 0             |                   |                     |       |            |          |              |               |
| Lys326                      | 350                 | 7     | 71.4285714 | 5        | 0            | 0             |                   |                     |       |            |          |              |               |
| Lys355                      | 379                 | 20    | 0          | 1        | 2            | 0             |                   |                     |       |            |          |              |               |
| Lys357                      | 381                 | 19    | 15.7894737 | 1        | 2            | 0             |                   |                     |       |            |          |              |               |

**Supplementary Table 2: NTSR1- $\beta$ arr1<sup>ACT</sup> complex sample, SDS-PAGE band 2.**

Obs'd denotes the number of times that residue is covered within the MS data. %mod denotes the fraction of times that residue is modified out of the total number of times it is observed. Dead-end denotes the number of times the residue is modified by a dead-end crosslinker. Xlink (self) denotes the number of times that the peptide bearing this residue is modified by a crosslinker which intramolecularly crosslinks the peptide. Xlink (other) denotes the number of times that the peptide bearing this residue is crosslinked to another peptide. N/A for Uniprot number is used when the reactive residue is not part

of the natural protein sequence. ND (not determined) is used when there are no observations of the given residue. Construct numbering denotes the residue number in the context of the construct used in this study.

| $\beta$ arr1 <sup>ACT</sup> |                     |       |             |          |              |               | NTSR1             |                     |       |            |          |              |               |
|-----------------------------|---------------------|-------|-------------|----------|--------------|---------------|-------------------|---------------------|-------|------------|----------|--------------|---------------|
| Uniprot numbering           | Construct numbering | Obs'd | %mod        | Dead-end | xlink (self) | xlink (other) | Uniprot numbering | Construct numbering | Obs'd | %mod       | Dead-end | xlink (self) | xlink (other) |
| N/A                         | 14                  | 18    | 33.33333333 | 4        | 1            | 1             | N/A               | 3                   | 0     | ND         | 0        | 0            | 0             |
| Lys4                        | 28                  | 51    | 29.4117647  | 11       | 2            | 2             | Lys63             | 86                  | 16    | 6.25       | 1        | 0            | 0             |
| Lys10                       | 34                  | 1     | 100         | 0        | 1            | 0             | Lys91             | 114                 | 2     | 100        | 0        | 0            | 2             |
| Lys11                       | 35                  | 3     | 0           | 0        | 0            | 0             | Lys92             | 115                 | 2     | 0          | 0        | 0            | 0             |
| Lys17                       | 41                  | 38    | 100         | 19       | 0            | 19            | Lys175            | 198                 | 17    | 11.7647059 | 1        | 1            | 0             |
| Lys24                       | 48                  | 47    | 40.4255319  | 0        | 0            | 19            | Lys177            | 200                 | 7     | 100        | 3        | 2            | 2             |
| Lys49                       | 73                  | 29    | 0           | 1        | 0            | 0             | Lys186            | 209                 | 0     | ND         | 0        | 0            | 0             |
| Lys77                       | 101                 | 69    | 53.6231884  | 17       | 19           | 1             | Lys187            | 210                 | 0     | ND         | 0        | 0            | 0             |
| Lys94                       | 118                 | 139   | 15.1079137  | 0        | 19           | 2             | Lys234            | 257                 | 8     | 0          | 0        | 0            | 0             |
| Lys95                       | 119                 | 41    | 9.75609756  | 0        | 3            | 1             | Lys262            | 285                 | 0     | ND         | 0        | 0            | 0             |
| Lys106                      | 130                 | 3     | 100         | 3        | 0            | 0             | Lys391            | 414                 | 60    | 25         | 15       | 0            | 0             |
| Lys107                      | 131                 | 22    | 4.54545455  | 1        | 0            | 0             | Lys398            | 421                 | 3     | 66.6666667 | 0        | 1            | 1             |
| Lys138                      | 162                 | 46    | 0           | 0        | 0            | 0             |                   |                     |       |            |          |              |               |
| Lys147                      | 171                 | 17    | 17.6470588  | 1        | 2            | 0             |                   |                     |       |            |          |              |               |
| Lys157                      | 181                 | 60    | 60          | 13       | 23           | 0             |                   |                     |       |            |          |              |               |
| Lys160                      | 184                 | 40    | 60          | 1        | 23           | 0             |                   |                     |       |            |          |              |               |
| Lys170                      | 194                 | 11    | 0           | 0        | 0            | 0             |                   |                     |       |            |          |              |               |
| Lys195                      | 219                 | 19    | 0           | 0        | 0            | 0             |                   |                     |       |            |          |              |               |
| Lys205                      | 229                 | 18    | 0           | 0        | 0            | 0             |                   |                     |       |            |          |              |               |
| Lys226                      | 250                 | 9     | 0           | 0        | 0            | 0             |                   |                     |       |            |          |              |               |
| Lys229                      | 253                 | 0     | 0           | 0        | 0            | 0             |                   |                     |       |            |          |              |               |
| Lys230                      | 254                 | 1     | 0           | 0        | 0            | 0             |                   |                     |       |            |          |              |               |
| Lys232                      | 256                 | 5     | 0           | 0        | 0            | 0             |                   |                     |       |            |          |              |               |
| Lys250                      | 274                 | 23    | 17.3913043  | 2        | 2            | 0             |                   |                     |       |            |          |              |               |
| Lys270                      | 294                 | 53    | 3.77358491  | 0        | 2            | 0             |                   |                     |       |            |          |              |               |
| Lys284                      | 308                 | 1     | ND          | 0        | 0            | 0             |                   |                     |       |            |          |              |               |
| Lys292                      | 316                 | 15    | 73.33333333 | 3        | 7            | 1             |                   |                     |       |            |          |              |               |
| Lys294                      | 318                 | 15    | 66.6666667  | 4        | 6            | 0             |                   |                     |       |            |          |              |               |
| Lys322                      | 346                 | 19    | 0           | 1        | 1            | 1             |                   |                     |       |            |          |              |               |
| Lys324                      | 348                 | 1     | 0           | 0        | 0            | 0             |                   |                     |       |            |          |              |               |
| Lys326                      | 350                 | 5     | 60          | 3        | 0            | 0             |                   |                     |       |            |          |              |               |
| Lys355                      | 379                 | 18    | 5.55555556  | 1        | 0            | 0             |                   |                     |       |            |          |              |               |
| Lys357                      | 381                 | 13    | 15.3846154  | 2        | 0            | 0             |                   |                     |       |            |          |              |               |

**Supplementary Table 3: NTSR1- $\beta$ arr1<sup>ACT</sup> complex sample, SDS-PAGE band 3.**

Obs'd denotes the number of times that residue is covered within the MS data. %mod denotes the fraction of times that residue is modified out of the total number of times it is observed. Dead-end denotes the number of times the residue is modified by a dead-end crosslinker. Xlink (self) denotes the number of times that the peptide bearing this residue is modified by a crosslinker which intramolecularly crosslinks the peptide. Xlink (other) denotes the number of times that the peptide bearing this residue is crosslinked to another peptide. N/A for Uniprot number is used when the reactive residue is not part



of the natural protein sequence. ND (not determined) is used when there are no observations of the given residue. Construct numbering denotes the residue number in the context of the construct used in this study.

| $\beta$ arr1 <sup>ACT</sup> |                     |       |            |          |              |               | NTSR1             |                     |       |      |          |              |               |
|-----------------------------|---------------------|-------|------------|----------|--------------|---------------|-------------------|---------------------|-------|------|----------|--------------|---------------|
| Uniprot numbering           | Construct numbering | Obs'd | %mod       | Dead-end | xlink (self) | xlink (other) | Uniprot numbering | Construct numbering | Obs'd | %mod | Dead-end | xlink (self) | xlink (other) |
| N/A                         | 14                  | 15    | 0          | 0        | 0            | 0             | N/A               | 3                   | 0     | ND   | 0        | 0            | 0             |
| Lys4                        | 28                  | 29    | 17.2413793 | 5        | 0            | 0             | Lys63             | 86                  | 11    | 0    | 0        | 0            | 0             |
| Lys10                       | 34                  | 0     | ND         | 0        | 0            | 0             | Lys91             | 114                 | 3     | 100  | 0        | 0            | 3             |
| Lys11                       | 35                  | 2     | 0          | 0        | 0            | 0             | Lys92             | 115                 | 3     | 0    | 0        | 0            | 0             |
| Lys17                       | 41                  | 22    | 100        | 9        | 13           | 0             | Lys175            | 198                 | 7     | 0    | 0        | 0            | 0             |
| Lys24                       | 48                  | 29    | 44.8275862 | 0        | 13           | 0             | Lys177            | 200                 | 2     | 100  | 2        | 0            | 0             |
| Lys49                       | 73                  | 10    | 0          | 0        | 0            | 0             | Lys186            | 209                 | 0     | ND   | 0        | 0            | 0             |
| Lys77                       | 101                 | 45    | 64.4444444 | 13       | 16           | 0             | Lys187            | 210                 | 0     | ND   | 0        | 0            | 0             |
| Lys94                       | 118                 | 103   | 15.5339806 | 0        | 16           | 0             | Lys234            | 257                 | 5     | 0    | 0        | 0            | 0             |
| Lys95                       | 119                 | 23    | 0          | 0        | 0            | 0             | Lys262            | 285                 | 0     | ND   | 0        | 0            | 0             |
| Lys106                      | 130                 | 2     | 50         | 1        | 0            | 0             | Lys391            | 414                 | 36    | 25   | 9        | 0            | 0             |
| Lys107                      | 131                 | 14    | 0          | 0        | 0            | 0             | Lys398            | 421                 | 1     | ND   | 0        | 0            | 0             |
| Lys138                      | 162                 | 35    | 0          | 0        | 0            | 0             |                   |                     |       |      |          |              |               |
| Lys147                      | 171                 | 9     | 0          | 0        | 0            | 0             |                   |                     |       |      |          |              |               |
| Lys157                      | 181                 | 27    | 66.6666667 | 9        | 9            | 0             |                   |                     |       |      |          |              |               |
| Lys160                      | 184                 | 16    | 56.25      | 0        | 9            | 0             |                   |                     |       |      |          |              |               |
| Lys170                      | 194                 | 12    | 0          | 0        | 0            | 0             |                   |                     |       |      |          |              |               |
| Lys195                      | 219                 | 16    | 0          | 0        | 0            | 0             |                   |                     |       |      |          |              |               |
| Lys205                      | 229                 | 15    | 0          | 0        | 0            | 0             |                   |                     |       |      |          |              |               |
| Lys226                      | 250                 | 5     | 0          | 0        | 0            | 0             |                   |                     |       |      |          |              |               |
| Lys229                      | 253                 | 0     | 0          | 0        | 0            | 0             |                   |                     |       |      |          |              |               |
| Lys230                      | 254                 | 0     | 0          | 0        | 0            | 0             |                   |                     |       |      |          |              |               |
| Lys232                      | 256                 | 3     | 100        | 3        | 0            | 0             |                   |                     |       |      |          |              |               |
| Lys250                      | 274                 | 11    | 18.1818182 | 0        | 1            | 1             |                   |                     |       |      |          |              |               |
| Lys270                      | 294                 | 21    | 0          | 0        | 0            | 0             |                   |                     |       |      |          |              |               |
| Lys284                      | 308                 | 0     | ND         | 0        | 0            | 0             |                   |                     |       |      |          |              |               |
| Lys292                      | 316                 | 9     | 66.6666667 | 0        | 5            | 1             |                   |                     |       |      |          |              |               |
| Lys294                      | 318                 | 7     | 85.7142857 | 2        | 0            | 4             |                   |                     |       |      |          |              |               |
| Lys322                      | 346                 | 13    | 0          | 0        | 0            | 0             |                   |                     |       |      |          |              |               |
| Lys324                      | 348                 | 1     | 0          | 0        | 0            | 0             |                   |                     |       |      |          |              |               |
| Lys326                      | 350                 | 3     | 66.6666667 | 2        | 0            | 0             |                   |                     |       |      |          |              |               |
| Lys355                      | 379                 | 9     | 0          | 0        | 0            | 0             |                   |                     |       |      |          |              |               |
| Lys357                      | 381                 | 9     | 22.2222222 | 2        | 0            | 0             |                   |                     |       |      |          |              |               |

**Supplementary Table 4: NTSR1- $\beta$ arr1<sup>ACT</sup> complex sample, SDS-PAGE band 4.**

Obs'd denotes the number of times that residue is covered within the MS data. %mod denotes the fraction of times that residue is modified out of the total number of times it is observed. Dead-end denotes the number of times the residue is modified by a dead-end crosslinker. Xlink (self) denotes the number of times that the peptide bearing this residue is modified by a crosslinker which intramolecularly crosslinks the peptide. Xlink (other) denotes the number of times that the peptide bearing this residue is crosslinked to another peptide. N/A for Uniprot number is used when the reactive residue is not part

of the natural protein sequence. ND (not determined) is used when there are no observations of the given residue. Construct numbering denotes the residue number in the context of the construct used in this study.

| Uniprot numbering | Construct numbering | Total Obs'd | Total Dead-end | Total xlink (self) | Total xlink (other) | Major xlink              | %mod | %dead-end | %xlink (self+other) |
|-------------------|---------------------|-------------|----------------|--------------------|---------------------|--------------------------|------|-----------|---------------------|
| N/A               | 14                  | 93          | 17             | 9                  | 1                   |                          | 29   | 18        | 11                  |
| Lys4              | 28                  | 228         | 27             | 10                 | 10                  |                          | 21   | 12        | 9                   |
| Lys10             | 34                  | 12          | 0              | 2                  | 1                   |                          | 25   | 0         | 25                  |
| Lys11             | 35                  | 25          | 0              | 0                  | 2                   |                          | 8    | 0         | 8                   |
| Lys17             | 41                  | 152         | 64             | 35                 | 23                  | intrastrand              | 80   | 42        | 38                  |
| Lys24             | 48                  | 186         | 2              | 64                 | 22                  | intrastrand              | 47   | 1         | 46                  |
| Lys49             | 73                  | 54          | 1              | 0                  | 0                   |                          | 2    | 2         | 0                   |
| Lys77             | 101                 | 251         | 67             | 74                 | 1                   | intrastrand              | 57   | 27        | 30                  |
| Lys94             | 118                 | 526         | 4              | 74                 | 2                   | intrastrand              | 15   | 1         | 14                  |
| Lys95             | 119                 | 160         | 4              | 8                  | 1                   | intrastrand              | 8    | 3         | 6                   |
| Lys106            | 130                 | 11          | 8              | 1                  | 1                   | mostly dead-end          | 91   | 73        | 18                  |
| Lys107            | 131                 | 65          | 2              | 1                  | 1                   |                          | 6    | 3         | 3                   |
| Lys138            | 162                 | 137         | 0              | 0                  | 0                   |                          | 0    | 0         | 0                   |
| Lys147            | 171                 | 68          | 2              | 5                  | 0                   |                          | 10   | 3         | 7                   |
| Lys157            | 181                 | 201         | 42             | 79                 | 4                   | intrastrand              | 62   | 21        | 41                  |
| Lys160            | 184                 | 120         | 2              | 75                 | 0                   | intrastrand              | 64   | 2         | 63                  |
| Lys170            | 194                 | 58          | 0              | 2                  | 2                   |                          | 7    | 0         | 7                   |
| Lys195            | 219                 | 86          | 10             | 4                  | 4                   |                          | 21   | 12        | 9                   |
| Lys205            | 229                 | 68          | 0              | 0                  | 0                   |                          | 0    | 0         | 0                   |
| Lys226            | 250                 | 37          | 2              | 2                  | 2                   |                          | 16   | 5         | 11                  |
| Lys229            | 253                 | 5           | 0              | 1                  | 1                   | None, failed to validate | 0    | 0         | 0                   |
| Lys230            | 254                 | 7           | 0              | 1                  | 0                   |                          | 14   | 0         | 14                  |
| Lys232            | 256                 | 24          | 14             | 3                  | 2                   | mostly dead end          | 79   | 58        | 21                  |
| Lys250            | 274                 | 71          | 3              | 3                  | 1                   |                          | 10   | 4         | 6                   |
| Lys270            | 294                 | 193         | 2              | 2                  | 0                   |                          | 2    | 1         | 1                   |
| Lys284            | 308                 | 8           | 0              | 0                  | 0                   |                          | 0    | 0         | 0                   |
| Lys292            | 316                 | 53          | 7              | 25                 | 2                   | intrastrand              | 64   | 13        | 51                  |
| Lys294            | 318                 | 50          | 12             | 19                 | 5                   | intrastrand              | 72   | 24        | 48                  |
| Lys322            | 346                 | 58          | 2              | 2                  | 2                   |                          | 10   | 3         | 7                   |
| Lys324            | 348                 | 4           | 1              | 0                  | 0                   |                          | 25   | 25        | 0                   |
| Lys326            | 350                 | 17          | 12             | 0                  | 0                   | all dead-end             | 71   | 71        | 0                   |
| Lys355            | 379                 | 49          | 2              | 2                  | 0                   |                          | 8    | 4         | 4                   |
| Lys357            | 381                 | 45          | 7              | 2                  | 0                   |                          | 20   | 16        | 4                   |

**Supplementary Table 5: Global analysis of modified residues in  $\beta$ arr1.**

Total Obs'd denotes the number of total times that residue is covered in the MS data, for all four gel bands (sum of **Supplementary Tables 1-4**). Total dead-end denotes the total number of times that residue is modified by a dead-end crosslinker across all four gel bands. Total xlink (self) denotes the number of times that the peptide bearing this residue is modified by a crosslinker which intramolecularly crosslinks the peptide, across all four gel bands. Total xlink (other) denotes the number of times that the peptide bearing this residue is crosslinked to another peptide, across all four gel bands. Major xlink denotes the most common type of modification observed for that residue, if there is one that clearly dominates. Intrastrand means that crosslinking within a given peptide is the most commonly seen modification. Failed to validate means that the spectrum that led to this assignment was of insufficient quality (by manual inspection) to make an assignment. %mod denotes the fraction of times that residue is modified out of the total number of times it is observed. %dead-end denotes the fraction of times this residue is modified by a dead-end crosslinker, out of the total. %xlink (self+other) denotes the fraction

of that this residue forms a crosslink, either intramolecularly or intermolecularly. N/A for Uniprot number is used when the reactive residue is not part of the natural protein sequence. Construct numbering denotes the residue number in the context of the construct used in this study. Lys 14, 28 and 381 (construct numbering) are not resolved in the model and are not represented in **Extended Data Figure 4**.

| Uniprot numbering | Construct numbering | Total Obs'd | Total Dead-end | Total xlink (self) | Total xlink (other) | %mod | %dead-end | %xlink (self+other) |
|-------------------|---------------------|-------------|----------------|--------------------|---------------------|------|-----------|---------------------|
| N/A               | 3                   | 0           | 0              | 0                  | 0                   | 0    | 0         | 0                   |
| Lys63             | 86                  | 57          | 1              | 0                  | 0                   | 2    | 2%        | 0%                  |
| Lys91             | 114                 | 5           | 0              | 0                  | 5                   | 100  | 0%        | 100%                |
| Lys92             | 115                 | 5           | 0              | 0                  | 0                   | 0    | 0%        | 0%                  |
| Lys175            | 198                 | 60          | 7              | 8                  | 3                   | 30   | 12%       | 18%                 |
| Lys177            | 200                 | 32          | 12             | 7                  | 6                   | 78   | 38%       | 41%                 |
| Lys186            | 209                 | 4           | 0              | 1                  | 3                   | 100  | 0%        | 100%                |
| Lys187            | 210                 | 1           | 1              | 0                  | 0                   | 100  | 100%      | 0%                  |
| Lys234            | 257                 | 34          | 0              | 0                  | 0                   | 0    | 0%        | 0%                  |
| Lys262            | 285                 | 0           | 0              | 0                  | 0                   | 0    | 0%        | 0%                  |
| Lys391            | 414                 | 220         | 53             | 2                  | 2                   | 26   | 24%       | 2%                  |
| Lys398            | 421                 | 11          | 0              | 1                  | 1                   | 18   | 0%        | 18%                 |

**Supplementary Table 6: Global analysis of modified residues in NTSR1.**

Total Obs'd denotes the number of total times that residue is covered in the MS data, for all four gel bands (sum of **Supplementary Tables 1-4**). Total dead-end denotes the total number of times that residue is modified by a dead-end crosslinker across all four gel bands. Total xlink (self) denotes the number of times that the peptide bearing this residue is modified by a crosslinker which intramolecularly crosslinks the peptide, across all four gel bands. Total xlink (other) denotes the number of times that the peptide bearing this residue is crosslinked to another peptide, across all four gel bands. %mod denotes the fraction of times that residue is modified out of the total number of times it is observed. %dead-end denotes the fraction of times this residue is modified by a dead-end crosslinker, out of the total. %xlink (self+other) denotes the fraction of that this residue forms a crosslink, either intramolecularly or intermolecularly. N/A for Uniprot number is used when the reactive residue is not part of the natural protein sequence. Construct numbering denotes the residue number in the context of the construct used in this study. Lys 3, 414 and 421 (construct numbering) are not resolved in the model and are not represented in **Extended Data Figure 4**.

| Gel band | Peptide                    | Protein Source | Xlink protein source | Xlink partner                         | Start AA peptide | End AA peptide | Xlink Partner Peptide Xlink Pos In Protein | Location within model                  | Approx. distance | comment                                          |
|----------|----------------------------|----------------|----------------------|---------------------------------------|------------------|----------------|--------------------------------------------|----------------------------------------|------------------|--------------------------------------------------|
| 1        | K.AFVAENLEEK.I             | arrestin       | arrestin             | K.IHK.R                               | 172              | 181            | 184                                        | top of N lobe                          | 9 Å              |                                                  |
| 1        | K.AsPnGkLTVVLGK.R          | arrestin       | arrestin             | K.AFVAENLEEK.I                        | 36               | 48             | 181                                        | top of N lobe                          | 8-15 Å           |                                                  |
| 1        | K.AsPnGkLTVVLGK.R          | arrestin       | arrestin             | K.IHK.R                               | 36               | 48             | 184                                        | top of N lobe                          | 9 Å              |                                                  |
| 2        | K.ErR.V                    | arrestin       | arrestin             | K.ALGVDEYK.A                          | 74               | 76             | 171                                        | top of N lobe                          | 14 Å             |                                                  |
| 2        | K.DLFVANVQSFPPAPEDkKPLTR.L | arrestin       | arrestin             | R.LQER.L                              | 102              | 123            | 127                                        | back helix of N lobe                   | 5-10 Å           |                                                  |
| 1        | K.IKISVR.Q                 | arrestin       | arrestin             | K.VPVAMEEADDTVAPSSTFSK.V              | 255              | 260            | 294                                        | C lobe adjacent strands                | 11.2 Å           |                                                  |
| 3        | R.EILGIIVSYk.V             | arrestin       | arrestin             | K.VK.V                                | 337              | 346            | 348                                        | within C lobe top                      | < 10 Å           |                                                  |
| 1, 2, 3  | R.DACTYATALNVASLSVEr.Y     | NTSR1          | NTSR1                | R.KK.S                                | 172              | 189            | 114                                        | TM4-TM5                                | 20 Å             |                                                  |
| 3        | R.KrPAFsr.K                | NTSR1          | NTSR1                | self                                  | 415              | 420            | n.a.                                       | receptor Cterm                         | < 10 Å           |                                                  |
| 2        | R.KrPAFsr.K                | NTSR1          | NTSR1                | self                                  | 415              | 420            | n.a.                                       | receptor Cterm                         | < 10 Å           |                                                  |
| 2        | R.YLAicHPfKak.T            | NTSR1          | NTSR1                | self                                  | 190              | 200            | n.a.                                       | ICL2                                   | < 10 Å           |                                                  |
| 1        | R.YLAicHPfKak.T            | NTSR1          | NTSR1                | self                                  | 190              | 200            | n.a.                                       | ICL2 to itself                         | < 10 Å           |                                                  |
| 1        | K.TLmsrSR.T                | NTSR1          | NTSR1                | R.TK.K                                | 201              | 207            | 209                                        | ICL2 to adjacent ICL2 peptide          | < 10 Å           | low confidence in base peptide due to triply mod |
| 1        | R.sRTk.K                   | NTSR1          | NTSR1                | K.TLMSRSR.T                           | 206              | 209            | 205                                        | ICL2 to adjacent ICL2 peptide          | < 10 Å           |                                                  |
| 1        | R.Rk.R                     | NTSR1          | arrestin             | G.PGGGLNDIFEAKIEWHEGSGSGDK.G          | 413              | 414            | 14                                         | Cterm of receptor to Nterm of arrestin | ND, not resolved |                                                  |
| 1        | K.rPAFsr.K                 | NTSR1          | arrestin             | K.RNSVR.L                             | 415              | 420            | 185                                        | Cterm of receptor to Nterm of arrestin | ND, not resolved |                                                  |
| 4        | R.KK.S                     | NTSR1          | arrestin             | R.QYADIVLNTAQYK.V                     | 114              | 115            | 274                                        | ICL to C-lobe strand                   | 10 Å             |                                                  |
| 3        | R.KK.S                     | NTSR1          | arrestin             | R.QYADIVLNTAQYKVPVAMEEADDTVAPSSTFSK.V | 114              | 115            | 274                                        | ICL to C-lobe strand                   | 10 Å             |                                                  |
| 3        | R.KK.S                     | NTSR1          | arrestin             | R.QYADIVLNTAQYK.V                     | 114              | 115            | 274                                        | ICL to C-lobe strand                   | 10 Å             |                                                  |

**Supplementary Table 7: Mapped crosslinks in NTSR1- $\beta$ arr1<sup>ΔCT</sup>.**

“Gel band” denotes the source of the crosslink that is being evaluated, bands 1 through 4 correspond to the bands on the SDS-PAGE gel shown in Extended Data Figure 3b, and are numbered from highest to lowest apparent molecular weight. “Peptide” denotes the “parent” species while “xlink partner” denotes the second peptide in the crosslink pair. “Protein source” denotes the origin of the parent “peptide”. “Xlink protein source” is the source of the crosslink partner. Crosslinks are sorted so that arrestin-arrestin intramolecular peptides are together, as is true for NTSR1-NTSR1 crosslinks and NTSR1-arrestin intermolecular crosslinks. The convention used for the peptides is that N and C terminal cleavage sites are denoted by a “.” The observed peptide is the species between the two periods. Lower case letters denote modified residues (by any PTM). “Start/end AA peptide” denotes the construct number of the first and last residue in the parent peptide, respectively. “xlink partner peptide xlink pos in protein” denotes the starting amino acid (construct numbering) of the crosslinking partner

peptide. "Location within model" denotes the region of the model where these residues are. "Approx distance" denotes an approximate distance measured (in pymol) between residues in the crosslinked peptide. For unresolved regions of the model this is designated "ND, not resolved". Since only one end of the crosslinker is specific it is difficult to map the exact position of the crosslink, these numbers are meant only to provide a sense of distance (within range of crosslinker, at the limit of the crosslinker length, beyond the length of the crosslinker (12.5 Å spacer arm)). One crosslink, for which there is a comment, is ambiguous due to modest spectral quality and a heavily modified parent peptide, but is listed since a crosslink in this region is physically consistent with other observed crosslinks in this region.



| Seq. | #  | a calc.   | a obs.   | a delta | b calc.   | b obs.    | b delta | b-18 calc. | b-18 obs. | b-18 delta | b++ calc. | b++ obs. | b++ delta |
|------|----|-----------|----------|---------|-----------|-----------|---------|------------|-----------|------------|-----------|----------|-----------|
| Q    | 1  | 101.0709  |          |         | 129.0659  | 129.0687  | 0.0028  | 111.0553   |           |            | 65.0366   |          |           |
| A    | 2  | 172.1081  | 172.1102 | 0.0022  | 200.103   | 200.1064  | 0.0035  | 182.0924   | 182.0957  | 0.0033     | 100.5551  |          |           |
| A    | 3  | 243.1452  | 243.1413 | 0.0039  | 271.1401  | 271.1437  | 0.0037  | 253.1295   | 253.1325  | 0.003      | 136.0737  |          |           |
| E    | 4  | 372.1878  | 372.1884 | 0.0007  | 400.1827  | 400.1866  | 0.004   | 382.1721   | 382.1747  | 0.0026     | 200.595   |          |           |
| Q    | 5  | 500.2463  | 500.2441 | 0.0022  | 528.2412  | 528.2464  | 0.0052  | 510.2307   | 510.2371  | 0.0064     | 264.6243  |          |           |
| G    | 6  | 557.2678  | 557.2758 | 0.008   | 585.2627  | 585.2729  | 0.0102  | 567.2521   | 567.2583  | 0.0061     | 293.135   |          |           |
| Q    | 7  | 685.3264  |          |         | 713.3213  | 713.3294  | 0.0081  | 695.3107   | 695.3195  | 0.0088     | 357.1643  |          |           |
| V    | 8  | 784.3948  | 784.3877 | 0.0071  | 812.3897  | 812.4036  | 0.0139  | 794.3791   | 794.3821  | 0.003      | 406.6985  | 406.6976 | 0.0009    |
| C    | 9  | 944.4254  | 944.4309 | 0.0054  | 972.4203  | 972.4362  | 0.0159  | 954.4098   | 954.4284  | 0.0186     | 486.7138  |          |           |
| T    | 10 | 1045.4731 |          |         | 1073.468  |           |         | 1055.4575  |           |            | 537.2376  |          |           |
| V    | 11 | 1144.5415 |          |         | 1172.5364 |           |         | 1154.5259  | 1154.5492 | 0.0233     | 586.7719  |          |           |
| G    | 12 | 1201.563  |          |         | 1229.5579 | 1229.5432 | 0.0147  | 1211.5473  | 1211.553  | 0.0057     | 615.2826  |          |           |
| G    | 13 | 1258.5844 |          |         | 1286.5794 |           |         | 1268.5688  |           |            | 643.7933  |          |           |
| E    | 14 | 1387.627  |          |         | 1415.6219 | 1415.6408 | 0.0188  | 1397.6114  |           |            | 708.3146  | 708.309  | 0.0056    |
| H    | 15 | 1524.6859 |          |         | 1552.6809 |           |         | 1534.6703  |           |            | 776.8441  | 776.845  | 0.001     |
| S    | 16 | 1611.718  |          |         | 1639.7129 |           |         | 1621.7023  |           |            | 820.3601  |          |           |
| T    | 17 | 1792.732  |          |         | 1820.7269 |           |         | 1802.7163  |           |            | 910.8671  |          |           |
| F    | 18 | 1939.8004 |          |         | 1967.7953 |           |         | 1949.7847  |           |            | 984.4013  |          |           |
| S    | 19 | 2026.8324 |          |         | 2054.8273 |           |         | 2036.8168  |           |            | 1027.9173 |          |           |
| M    | 20 | 2157.8729 |          |         | 2185.8678 |           |         | 2167.8572  |           |            | 1093.4375 |          |           |
| A    | 21 | 2228.91   |          |         | 2256.9049 |           |         | 2238.8944  |           |            | 1128.9561 |          |           |
| I    | 22 | 2341.9941 |          |         | 2369.989  |           |         | 2351.9784  |           |            | 1185.4981 |          |           |
| E    | 23 | 2471.0367 |          |         | 2499.0316 |           |         | 2481.021   |           |            | 1250.0194 |          |           |
| P    | 24 | 2568.0894 |          |         | 2596.0843 |           |         | 2578.0738  |           |            | 1298.5458 |          |           |
| G    | 25 | 2625.1109 |          |         | 2653.1058 |           |         | 2635.0952  |           |            | 1327.0565 |          |           |
| R    | 26 |           |          |         |           |           |         |            |           |            |           |          |           |

**Supplementary Table 8: a and b ions observed for peptide**

**QAAEQGQVC(carbamidomethyl)TVGGEHST(phospho)FSMAIEPGR bearing pT285.**

“Seq.” denotes the residue in the peptide, “#” denotes the number from the beginning of counting fragment ions of that type. A letter shown in red denotes an assigned phosphosite. “a/b/y calc.” denotes the calculated m/z for the corresponding a/b/y ion. “a/b/y obs.” denotes the observed m/z for the ion, if observed. If a species is not observed the corresponding obs. cell will be empty. “a/b/y delta” denotes the deviation (in m/z) between the calculated and observed species. “b/y++” denotes double charged fragment ions, if not specified fragment ions are single charged. b-18 denotes an ion which has lost a water molecule. For clarity modifications are not explicitly listed in the “Seq” column, but explicitly stated in the table title.

| Seq. | y calc.   | y obs.    | y delta | y++ calc. | y++ obs.  | y++ delta | #  |
|------|-----------|-----------|---------|-----------|-----------|-----------|----|
| Q    |           |           |         |           |           |           | 26 |
| A    | 2699.1589 |           |         | 1350.0831 | 1350.0946 | 0.0115    | 25 |
| A    | 2628.1218 |           |         | 1314.5645 |           |           | 24 |
| E    | 2557.0847 |           |         | 1279.046  | 1279.0515 | 0.0056    | 23 |
| Q    | 2428.0421 |           |         | 1214.5247 | 1214.5414 | 0.0167    | 22 |
| G    | 2299.9835 |           |         | 1150.4954 | 1150.5117 | 0.0163    | 21 |
| Q    | 2242.962  |           |         | 1121.9847 | 1121.9983 | 0.0136    | 20 |
| V    | 2114.9035 |           |         | 1057.9554 | 1057.9696 | 0.0143    | 19 |
| C    | 2015.835  |           |         | 1008.4212 | 1008.4342 | 0.013     | 18 |
| T    | 1855.8044 |           |         | 928.4058  | 928.4193  | 0.0135    | 17 |
| V    | 1754.7567 |           |         | 877.882   | 877.8923  | 0.0103    | 16 |
| G    | 1655.6883 | 1655.7509 | 0.0626  | 828.3478  | 828.3548  | 0.007     | 15 |
| G    | 1598.6669 |           |         | 799.8371  | 799.8505  | 0.0134    | 14 |
| E    | 1541.6454 |           |         | 771.3263  |           |           | 13 |
| H    | 1412.6028 | 1412.6108 | 0.008   | 706.805   | 706.8129  | 0.0078    | 12 |
| S    | 1275.5439 | 1275.5639 | 0.02    | 638.2756  |           |           | 11 |
| T    | 1188.5119 | 1188.5155 | 0.0036  | 594.7596  |           |           | 10 |
| F    | 1007.4979 |           |         | 504.2526  |           |           | 9  |
| S    | 860.4294  | 860.4354  | 0.006   | 430.7184  |           |           | 8  |
| M    | 773.3974  | 773.4094  | 0.012   | 387.2023  |           |           | 7  |
| A    | 642.3569  | 642.3625  | 0.0055  | 321.6821  |           |           | 6  |
| I    | 571.3198  | 571.3264  | 0.0066  | 286.1635  |           |           | 5  |
| E    | 458.2358  | 458.2413  | 0.0055  | 229.6215  |           |           | 4  |
| P    | 329.1932  | 329.1942  | 0.001   | 165.1002  |           |           | 3  |
| G    | 232.1404  | 232.138   | -0.0024 | 116.5738  |           |           | 2  |
| R    | 175.119   | 175.1222  | 0.0032  | 88.0631   |           |           | 1  |

**Supplementary Table 9: y ions observed for peptide**

**QAAEQGQVC(carbamidomethyl)TVGGEHST(phospho)FSMAIEPGR bearing pT285.**

“Seq.” denotes the residue in the peptide, “#” denotes the number from the beginning of counting fragment ions of that type. A letter shown in red denotes an assigned phosphosite. “a/b/y calc.” denotes the calculated m/z for the corresponding a/b/y ion. “a/b/y obs.” denotes the observed m/z for the ion, if observed. If a species is not observed the corresponding obs. cell will be empty. “a/b/y delta” denotes the deviation (in m/z) between the calculated and observed species. “b/y++” denotes double charged fragment ions, if not specified fragment ions are single charged. b-18 denotes an ion which has lost a water molecule. For clarity modifications are not explicitly listed in the “Seq” column, but explicitly stated in the table title.

| Seq. | #  | a calc.   | a obs.   | a delta | b calc.   | b obs.    | b delta | b-18 calc. | b-18 obs. | b-18 delta | b++ calc. | b++ obs. | b++ delta |
|------|----|-----------|----------|---------|-----------|-----------|---------|------------|-----------|------------|-----------|----------|-----------|
| Q    | 1  | 101.0709  |          |         | 129.0659  |           |         | 111.0553   |           |            | 65.0366   |          |           |
| A    | 2  | 172.1081  | 172.1105 | 0.0025  | 200.103   | 200.1059  | 0.003   | 182.0924   | 182.0974  | 0.005      | 100.5551  |          |           |
| A    | 3  | 243.1452  | 243.1446 | 0.0006  | 271.1401  | 271.1426  | 0.0025  | 253.1295   | 253.1325  | 0.003      | 136.0737  |          |           |
| E    | 4  | 372.1878  | 372.1912 | 0.0034  | 400.1827  | 400.1877  | 0.0051  | 382.1721   | 382.176   | 0.0039     | 200.595   |          |           |
| Q    | 5  | 500.2463  |          |         | 528.2412  | 528.2457  | 0.0045  | 510.2307   | 510.2397  | 0.009      | 264.6243  |          |           |
| G    | 6  | 557.2678  | 557.2798 | 0.012   | 585.2627  | 585.2735  | 0.0108  | 567.2521   | 567.2583  | 0.0061     | 293.135   |          |           |
| Q    | 7  | 685.3264  | 685.3277 | 0.0013  | 713.3213  | 713.3337  | 0.0124  | 695.3107   | 695.3175  | 0.0067     | 357.1643  |          |           |
| V    | 8  | 784.3948  | 784.4091 | 0.0143  | 812.3897  | 812.3973  | 0.0076  | 794.3791   | 794.3874  | 0.0083     | 406.6985  |          |           |
| C    | 9  | 944.4254  |          |         | 972.4203  | 972.4405  | 0.0202  | 954.4098   | 954.4337  | 0.0239     | 486.7138  |          |           |
| T    | 10 | 1045.4731 |          |         | 1073.468  |           |         | 1055.4575  |           |            | 537.2376  |          |           |
| V    | 11 | 1144.5415 |          |         | 1172.5364 | 1172.547  | 0.0105  | 1154.5259  | 1154.5385 | 0.0127     | 586.7719  |          |           |
| G    | 12 | 1201.563  |          |         | 1229.5579 | 1229.5464 | 0.0115  | 1211.5473  |           |            | 615.2826  |          |           |
| G    | 13 | 1258.5844 |          |         | 1286.5794 |           |         | 1268.5688  |           |            | 643.7933  |          |           |
| E    | 14 | 1387.627  |          |         | 1415.6219 |           |         | 1397.6114  | 1397.6381 | 0.0268     | 708.3146  |          |           |
| H    | 15 | 1524.6859 |          |         | 1552.6809 |           |         | 1534.6703  |           |            | 776.8441  |          |           |
| S    | 16 | 1611.718  |          |         | 1639.7129 |           |         | 1621.7023  |           |            | 820.3601  | 820.3647 | 0.0047    |
| T    | 17 | 1712.7656 |          |         | 1740.7606 |           |         | 1722.75    |           |            | 870.8839  | 870.8879 | 0.004     |
| F    | 18 | 1859.8341 |          |         | 1887.829  |           |         | 1869.8184  |           |            | 944.4181  | 944.4263 | 0.0081    |
| S    | 19 | 2026.8324 |          |         | 2054.8273 |           |         | 2036.8168  |           |            | 1027.9173 |          |           |
| M    | 20 | 2157.8729 |          |         | 2185.8678 |           |         | 2167.8572  |           |            | 1093.4375 |          |           |
| A    | 21 | 2228.91   |          |         | 2256.9049 |           |         | 2238.8944  |           |            | 1128.9561 |          |           |
| I    | 22 | 2341.9941 |          |         | 2369.989  |           |         | 2351.9784  |           |            | 1185.4981 |          |           |
| E    | 23 | 2471.0367 |          |         | 2499.0316 |           |         | 2481.021   |           |            | 1250.0194 |          |           |
| P    | 24 | 2568.0894 |          |         | 2596.0843 |           |         | 2578.0738  |           |            | 1298.5458 |          |           |
| G    | 25 | 2625.1109 |          |         | 2653.1058 |           |         | 2635.0952  |           |            | 1327.0565 |          |           |
| R    | 26 |           |          |         |           |           |         |            |           |            |           |          |           |

**Supplementary Table 10: a and b ions observed for peptide**

**QAAEQGQVC(carbamidomethyl)TVGGEHSTFS(phospho)MAIEPGR bearing pS287.**

“Seq.” denotes the residue in the peptide, “#” denotes the number from the beginning of counting fragment ions of that type. A letter shown in red denotes an assigned phosphosite. “a/b/y calc.” denotes the calculated m/z for the corresponding a/b/y ion. “a/b/y obs.” denotes the observed m/z for the ion, if observed. If a species is not observed the corresponding obs. cell will be empty. “a/b/y delta” denotes the deviation (in m/z) between the calculated and observed species. “b/y++” denotes double charged fragment ions, if not specified fragment ions are single charged. b-18 denotes an ion which has lost a water molecule. For clarity modifications are not explicitly listed in the “Seq” column, but explicitly stated in the table title.

| Seq. | y calc.   | y obs.    | y delta | y++ calc. | y++ obs.  | y++ delta | #  |
|------|-----------|-----------|---------|-----------|-----------|-----------|----|
| Q    |           |           |         |           |           |           | 26 |
| A    | 2699.1589 |           |         | 1350.0831 | 1350.1065 | 0.0234    | 25 |
| A    | 2628.1218 |           |         | 1314.5645 |           |           | 24 |
| E    | 2557.0847 |           |         | 1279.046  | 1279.062  | 0.016     | 23 |
| Q    | 2428.0421 |           |         | 1214.5247 | 1214.5423 | 0.0177    | 22 |
| G    | 2299.9835 |           |         | 1150.4954 | 1150.5075 | 0.0121    | 21 |
| Q    | 2242.962  |           |         | 1121.9847 | 1121.9941 | 0.0095    | 20 |
| V    | 2114.9035 |           |         | 1057.9554 | 1057.9626 | 0.0072    | 19 |
| C    | 2015.835  |           |         | 1008.4212 | 1008.4415 | 0.0203    | 18 |
| T    | 1855.8044 |           |         | 928.4058  | 928.4195  | 0.0137    | 17 |
| V    | 1754.7567 |           |         | 877.882   | 877.897   | 0.015     | 16 |
| G    | 1655.6883 |           |         | 828.3478  | 828.354   | 0.0062    | 15 |
| G    | 1598.6669 |           |         | 799.8371  | 799.8468  | 0.0098    | 14 |
| E    | 1541.6454 |           |         | 771.3263  |           |           | 13 |
| H    | 1412.6028 |           |         | 706.805   | 706.8133  | 0.0082    | 12 |
| S    | 1275.5439 | 1275.5682 | 0.0243  | 638.2756  | 638.2773  | 0.0017    | 11 |
| T    | 1188.5119 | 1188.5232 | 0.0113  | 594.7596  |           |           | 10 |
| F    | 1087.4642 | 1087.4831 | 0.0189  | 544.2357  |           |           | 9  |
| S    | 940.3958  | 940.4126  | 0.0168  | 470.7015  |           |           | 8  |
| M    | 773.3974  | 773.4095  | 0.0121  | 387.2023  |           |           | 7  |
| A    | 642.3569  | 642.3616  | 0.0047  | 321.6821  |           |           | 6  |
| I    | 571.3198  | 571.3247  | 0.0049  | 286.1635  |           |           | 5  |
| E    | 458.2358  | 458.2416  | 0.0058  | 229.6215  |           |           | 4  |
| P    | 329.1932  | 329.1917  | -0.0015 | 165.1002  |           |           | 3  |
| G    | 232.1404  | 232.1426  | 0.0022  | 116.5738  |           |           | 2  |
| R    | 175.119   | 175.1222  | 0.0032  | 88.0631   |           |           | 1  |

**Supplementary Table 11: y ions observed for peptide**

**QAAEQGQVC(carbamidomethyl)TVGGEHSTFS(phospho)MAIEPGR bearing pS287.**

“Seq.” denotes the residue in the peptide, “#” denotes the number from the beginning of counting fragment ions of that type. A letter shown in red denotes an assigned phosphosite. “a/b/y calc.” denotes the calculated m/z for the corresponding a/b/y ion. “a/b/y obs.” denotes the observed m/z for the ion, if observed. If a species is not observed the corresponding obs. cell will be empty. “a/b/y delta” denotes the deviation (in m/z) between the calculated and observed species. “b/y++” denotes double charged fragment ions, if not specified fragment ions are single charged. b-18 denotes an ion which has lost a water molecule. For clarity modifications are not explicitly listed in the “Seq” column, but explicitly stated in the table title.

| Seq. | #  | a calc.   | a obs.    | a delta | b calc.   | b obs.    | b delta | b-18 calc. | b-18 obs. | b-18 delta | b++ calc. | b++ obs.  | b++ delta |
|------|----|-----------|-----------|---------|-----------|-----------|---------|------------|-----------|------------|-----------|-----------|-----------|
| Q    | 1  | 101.0709  |           |         | 129.0659  | 129.0694  | 0.0036  | 111.0553   |           |            | 65.0366   |           |           |
| A    | 2  | 172.1081  | 172.1108  | 0.0028  | 200.103   | 200.1057  | 0.0027  | 182.0924   | 182.0947  | 0.0023     | 100.5551  |           |           |
| A    | 3  | 243.1452  | 243.1472  | 0.0021  | 271.1401  | 271.1428  | 0.0027  | 253.1295   | 253.1309  | 0.0014     | 136.0737  |           |           |
| E    | 4  | 372.1878  | 372.1882  | 0.0005  | 400.1827  | 400.1873  | 0.0047  | 382.1721   | 382.1768  | 0.0047     | 200.595   |           |           |
| Q    | 5  | 500.2463  | 500.2471  | 0.0008  | 528.2412  | 528.2468  | 0.0056  | 510.2307   | 510.2414  | 0.0107     | 264.6243  |           |           |
| G    | 6  | 557.2678  | 557.2691  | 0.0013  | 585.2627  | 585.2696  | 0.0069  | 567.2521   | 567.2607  | 0.0086     | 293.135   |           |           |
| Q    | 7  | 685.3264  | 685.3212  | 0.0051  | 713.3213  | 713.3301  | 0.0088  | 695.3107   | 695.321   | 0.0103     | 357.1643  |           |           |
| V    | 8  | 784.3948  | 784.3911  | 0.0037  | 812.3897  | 812.3975  | 0.0078  | 794.3791   | 794.3925  | 0.0134     | 406.6985  |           |           |
| C    | 9  | 944.4254  | 944.4192  | 0.0063  | 972.4203  | 972.4306  | 0.0103  | 954.4098   | 954.4297  | 0.0199     | 486.7138  |           |           |
| T    | 10 | 1045.4731 | 1045.4732 | 0.0001  | 1073.468  | 1073.4934 | 0.0254  | 1055.4575  | 1055.4763 | 0.0188     | 537.2376  |           |           |
| V    | 11 | 1144.5415 |           |         | 1172.5364 | 1172.5511 | 0.0146  | 1154.5259  | 1154.5437 | 0.0178     | 586.7719  |           |           |
| G    | 12 | 1201.563  |           |         | 1229.5579 | 1229.5855 | 0.0276  | 1211.5473  | 1211.5694 | 0.0221     | 615.2826  |           |           |
| G    | 13 | 1258.5844 |           |         | 1286.5794 |           |         | 1268.5688  |           |            | 643.7933  |           |           |
| E    | 14 | 1387.627  |           |         | 1415.6219 | 1415.6204 | 0.0016  | 1397.6114  | 1397.6153 | 0.0039     | 708.3146  | 708.3142  | 0.0004    |
| H    | 15 | 1524.6859 |           |         | 1552.6809 |           |         | 1534.6703  |           |            | 776.8441  | 776.8544  | 0.0103    |
| S    | 16 | 1691.6843 |           |         | 1719.6792 |           |         | 1701.6686  |           |            | 860.3432  |           |           |
| T    | 17 | 1792.732  |           |         | 1820.7269 |           |         | 1802.7163  |           |            | 910.8671  |           |           |
| F    | 18 | 1939.8004 |           |         | 1967.7953 |           |         | 1949.7847  |           |            | 984.4013  | 984.4192  | 0.0179    |
| S    | 19 | 2026.8324 |           |         | 2054.8273 |           |         | 2036.8168  |           |            | 1027.9173 | 1027.9332 | 0.0159    |
| M    | 20 | 2157.8729 |           |         | 2185.8678 |           |         | 2167.8572  |           |            | 1093.4375 |           |           |
| A    | 21 | 2228.91   |           |         | 2256.9049 |           |         | 2238.8944  |           |            | 1128.9561 | 1128.9863 | 0.0302    |
| I    | 22 | 2341.9941 |           |         | 2369.989  |           |         | 2351.9784  |           |            | 1185.4981 | 1185.5153 | 0.0171    |
| E    | 23 | 2471.0367 |           |         | 2499.0316 |           |         | 2481.021   |           |            | 1250.0194 | 1250.0368 | 0.0174    |
| P    | 24 | 2568.0894 |           |         | 2596.0843 |           |         | 2578.0738  |           |            | 1298.5458 |           |           |
| G    | 25 | 2625.1109 |           |         | 2653.1058 |           |         | 2635.0952  |           |            | 1327.0565 | 1327.0556 | -0.001    |
| R    | 26 |           |           |         |           |           |         |            |           |            |           |           |           |

**Supplementary Table 12: a and b ions observed for peptide**

**QAAEQGQVC(carbamidomethyl)TVGGEHS(phospho)TFSMAIEPGR bearing pS284.**

“Seq.” denotes the residue in the peptide, “#” denotes the number from the beginning of counting fragment ions of that type. A letter shown in red denotes an assigned phosphosite. “a/b/y calc.” denotes the calculated m/z for the corresponding a/b/y ion. “a/b/y obs.” denotes the observed m/z for the ion, if observed. If a species is not observed the corresponding obs. cell will be empty. “a/b/y delta” denotes the deviation (in m/z) between the calculated and observed species. “b/y++” denotes double charged fragment ions, if not specified fragment ions are single charged. b-18 denotes an ion which has lost a water molecule. For clarity modifications are not explicitly listed in the “Seq” column, but explicitly stated in the table title.

| Seq. | y calc.   | y obs.    | y delta | y++ calc. | y++ obs.  | y++ delta | #  |
|------|-----------|-----------|---------|-----------|-----------|-----------|----|
| Q    |           |           |         |           |           |           | 26 |
| A    | 2699.1589 |           |         | 1350.0831 | 1350.1016 | 0.0185    | 25 |
| A    | 2628.1218 |           |         | 1314.5645 |           |           | 24 |
| E    | 2557.0847 |           |         | 1279.046  | 1279.0608 | 0.0148    | 23 |
| Q    | 2428.0421 |           |         | 1214.5247 | 1214.5383 | 0.0136    | 22 |
| G    | 2299.9835 |           |         | 1150.4954 | 1150.509  | 0.0136    | 21 |
| Q    | 2242.962  |           |         | 1121.9847 | 1121.9976 | 0.013     | 20 |
| V    | 2114.9035 |           |         | 1057.9554 | 1057.967  | 0.0116    | 19 |
| C    | 2015.835  |           |         | 1008.4212 | 1008.4326 | 0.0115    | 18 |
| T    | 1855.8044 |           |         | 928.4058  | 928.4169  | 0.011     | 17 |
| V    | 1754.7567 |           |         | 877.882   | 877.8917  | 0.0097    | 16 |
| G    | 1655.6883 | 1655.7166 | 0.0283  | 828.3478  | 828.3579  | 0.0101    | 15 |
| G    | 1598.6669 | 1598.674  | 0.0072  | 799.8371  | 799.8482  | 0.0111    | 14 |
| E    | 1541.6454 |           |         | 771.3263  | 771.3345  | 0.0082    | 13 |
| H    | 1412.6028 |           |         | 706.805   | 706.8126  | 0.0075    | 12 |
| S    | 1275.5439 | 1275.5604 | 0.0165  | 638.2756  |           |           | 11 |
| T    | 1108.5455 | 1108.5589 | 0.0134  | 554.7764  |           |           | 10 |
| F    | 1007.4979 |           |         | 504.2526  |           |           | 9  |
| S    | 860.4294  | 860.4392  | 0.0097  | 430.7184  | 430.7191  | 0.0008    | 8  |
| M    | 773.3974  | 773.4073  | 0.0099  | 387.2023  | 387.202   | -0.0003   | 7  |
| A    | 642.3569  | 642.3663  | 0.0093  | 321.6821  |           |           | 6  |
| I    | 571.3198  | 571.3272  | 0.0074  | 286.1635  |           |           | 5  |
| E    | 458.2358  | 458.2408  | 0.0051  | 229.6215  |           |           | 4  |
| P    | 329.1932  | 329.1925  | -0.0007 | 165.1002  |           |           | 3  |
| G    | 232.1404  | 232.1396  | -0.0009 | 116.5738  |           |           | 2  |
| R    | 175.119   | 175.1205  | 0.0015  | 88.0631   |           |           | 1  |

**Supplementary Table 13: y ions observed for peptide**

**QAAEQGQVC(carbamidomethyl)TVGGEHS(phospho)TFSMAIEPGR bearing pS284.**

“Seq.” denotes the residue in the peptide, “#” denotes the number from the beginning of counting fragment ions of that type. A letter shown in red denotes an assigned phosphosite. “a/b/y calc.” denotes the calculated m/z for the corresponding a/b/y ion. “a/b/y obs.” denotes the observed m/z for the ion, if observed. If a species is not observed the corresponding obs. cell will be empty. “a/b/y delta” denotes the deviation (in m/z) between the calculated and observed species. “b/y++” denotes double charged fragment ions, if not specified fragment ions are single charged. b-18 denotes an ion which has lost a water molecule. For clarity modifications are not explicitly listed in the “Seq” column, but explicitly stated in the table title.

| Seq. | #  | a calc.   | a obs.    | a delta | b calc.   | b obs.    | b delta | b-18 calc. | b-18 obs. | b-18 delta | b++ calc. | b++ obs.  | b++ delta |
|------|----|-----------|-----------|---------|-----------|-----------|---------|------------|-----------|------------|-----------|-----------|-----------|
| Q    | 1  | 101.0709  |           |         | 129.0659  | 129.0696  | 0.0038  | 111.0553   |           |            | 65.0366   |           |           |
| A    | 2  | 172.1081  | 172.1105  | 0.0024  | 200.103   | 200.1057  | 0.0027  | 182.0924   | 182.0951  | 0.0027     | 100.5551  |           |           |
| A    | 3  | 243.1452  | 243.1466  | 0.0014  | 271.1401  | 271.1422  | 0.0022  | 253.1295   | 253.1319  | 0.0024     | 136.0737  |           |           |
| E    | 4  | 372.1878  | 372.1913  | 0.0036  | 400.1827  | 400.1874  | 0.0047  | 382.1721   | 382.1755  | 0.0034     | 200.595   |           |           |
| Q    | 5  | 500.2463  | 500.2491  | 0.0028  | 528.2412  | 528.246   | 0.0048  | 510.2307   | 510.2378  | 0.0071     | 264.6243  |           |           |
| G    | 6  | 557.2678  | 557.2544  | 0.0134  | 585.2627  | 585.2706  | 0.0079  | 567.2521   | 567.2618  | 0.0097     | 293.135   |           |           |
| Q    | 7  | 685.3264  | 685.3291  | 0.0027  | 713.3213  | 713.3324  | 0.0111  | 695.3107   | 695.3218  | 0.0111     | 357.1643  |           |           |
| V    | 8  | 784.3948  | 784.4032  | 0.0085  | 812.3897  | 812.3973  | 0.0076  | 794.3791   | 794.3873  | 0.0082     | 406.6985  | 406.703   | 0.0045    |
| C    | 9  | 944.4254  | 944.4221  | 0.0033  | 972.4203  | 972.4325  | 0.0122  | 954.4098   | 954.4179  | 0.0081     | 486.7138  |           |           |
| T    | 10 | 1125.4394 |           |         | 1153.4344 |           |         | 1135.4238  |           |            | 577.2208  |           |           |
| V    | 11 | 1224.5078 | 1224.5126 | 0.0048  | 1252.5028 | 1252.5305 | 0.0278  | 1234.4922  | 1234.5188 | 0.0266     | 626.755   |           |           |
| G    | 12 | 1281.5293 |           |         | 1309.5242 |           |         | 1291.5137  | 1291.5404 | 0.0267     | 655.2657  |           |           |
| G    | 13 | 1338.5508 |           |         | 1366.5457 | 1366.5832 | 0.0376  | 1348.5351  |           |            | 683.7765  |           |           |
| E    | 14 | 1467.5934 |           |         | 1495.5883 | 1495.5952 | 0.0069  | 1477.5777  |           |            | 748.2978  |           |           |
| H    | 15 | 1604.6523 | 1604.6323 | 0.0199  | 1632.6472 |           |         | 1614.6366  |           |            | 816.8272  | 816.8383  | 0.0111    |
| S    | 16 | 1691.6843 |           |         | 1719.6792 |           |         | 1701.6686  |           |            | 860.3432  |           |           |
| T    | 17 | 1792.732  |           |         | 1820.7269 |           |         | 1802.7163  |           |            | 910.8671  |           |           |
| F    | 18 | 1939.8004 |           |         | 1967.7953 |           |         | 1949.7847  |           |            | 984.4013  | 984.4054  | 0.0041    |
| S    | 19 | 2026.8324 |           |         | 2054.8273 |           |         | 2036.8168  |           |            | 1027.9173 |           |           |
| M    | 20 | 2157.8729 |           |         | 2185.8678 |           |         | 2167.8572  |           |            | 1093.4375 |           |           |
| A    | 21 | 2228.91   |           |         | 2256.9049 |           |         | 2238.8944  |           |            | 1128.9561 | 1128.9741 | 0.018     |
| I    | 22 | 2341.9941 |           |         | 2369.989  |           |         | 2351.9784  |           |            | 1185.4981 | 1185.5272 | 0.0291    |
| E    | 23 | 2471.0367 |           |         | 2499.0316 |           |         | 2481.021   |           |            | 1250.0194 | 1250.0205 | 0.0011    |
| P    | 24 | 2568.0894 |           |         | 2596.0843 |           |         | 2578.0738  |           |            | 1298.5458 |           |           |
| G    | 25 | 2625.1109 |           |         | 2653.1058 |           |         | 2635.0952  |           |            | 1327.0565 |           |           |
| R    | 26 |           |           |         |           |           |         |            |           |            |           |           |           |

**Supplementary Table 14: a and b ions observed for peptide**

**QAAEQGQVC(carbamidomethyl)T(phospho)VGGEHSTFMSMAIEPGR bearing pT278.**

“Seq.” denotes the residue in the peptide, “#” denotes the number from the beginning of counting fragment ions of that type. A letter shown in red denotes an assigned phosphosite. “a/b/y calc.” denotes the calculated m/z for the corresponding a/b/y ion. “a/b/y obs.” denotes the observed m/z for the ion, if observed. If a species is not observed the corresponding obs. cell will be empty. “a/b/y delta” denotes the deviation (in m/z) between the calculated and observed species. “b/y++” denotes double charged fragment ions, if not specified fragment ions are single charged. b-18 denotes an ion which has lost a water molecule. For clarity modifications are not explicitly listed in the “Seq” column, but explicitly stated in the table title.

| Seq. | y calc.   | y obs.    | y delta | y++ calc. | y++ obs.  | y++ delta | #  |
|------|-----------|-----------|---------|-----------|-----------|-----------|----|
| Q    |           |           |         |           |           |           | 26 |
| A    | 2699.1589 |           |         | 1350.0831 | 1350.0893 | 0.0062    | 25 |
| A    | 2628.1218 |           |         | 1314.5645 | 1314.5801 | 0.0156    | 24 |
| E    | 2557.0847 |           |         | 1279.046  | 1279.0615 | 0.0156    | 23 |
| Q    | 2428.0421 |           |         | 1214.5247 | 1214.5426 | 0.0179    | 22 |
| G    | 2299.9835 |           |         | 1150.4954 | 1150.5105 | 0.0151    | 21 |
| Q    | 2242.962  |           |         | 1121.9847 | 1121.9954 | 0.0108    | 20 |
| V    | 2114.9035 |           |         | 1057.9554 | 1057.969  | 0.0137    | 19 |
| C    | 2015.835  |           |         | 1008.4212 | 1008.4375 | 0.0163    | 18 |
| T    | 1855.8044 |           |         | 928.4058  | 928.4168  | 0.011     | 17 |
| V    | 1674.7904 | 1674.8072 | 0.0168  | 837.8988  | 837.9109  | 0.0121    | 16 |
| G    | 1575.722  | 1575.7409 | 0.019   | 788.3646  | 788.3754  | 0.0108    | 15 |
| G    | 1518.7005 | 1518.718  | 0.0175  | 759.8539  | 759.8611  | 0.0072    | 14 |
| E    | 1461.6791 | 1461.6954 | 0.0164  | 731.3432  | 731.3539  | 0.0107    | 13 |
| H    | 1332.6365 | 1332.6523 | 0.0158  | 666.8219  | 666.8305  | 0.0086    | 12 |
| S    | 1195.5776 | 1195.5883 | 0.0107  | 598.2924  |           |           | 11 |
| T    | 1108.5455 | 1108.5584 | 0.0129  | 554.7764  |           |           | 10 |
| F    | 1007.4979 |           |         | 504.2526  | 504.2631  | 0.0105    | 9  |
| S    | 860.4294  | 860.4396  | 0.0102  | 430.7184  | 430.7191  | 0.0008    | 8  |
| M    | 773.3974  | 773.4062  | 0.0088  | 387.2023  |           |           | 7  |
| A    | 642.3569  | 642.3635  | 0.0066  | 321.6821  |           |           | 6  |
| I    | 571.3198  | 571.3271  | 0.0073  | 286.1635  |           |           | 5  |
| E    | 458.2358  | 458.2412  | 0.0055  | 229.6215  |           |           | 4  |
| P    | 329.1932  | 329.1924  | -0.0008 | 165.1002  |           |           | 3  |
| G    | 232.1404  | 232.1409  | 0.0005  | 116.5738  |           |           | 2  |
| R    | 175.119   | 175.1196  | 0.0006  | 88.0631   |           |           | 1  |

**Supplementary Table 15: y ions observed for peptide**

**QAAEQGQVC(carbamidomethyl)T(phospho)VGGEHSTFMSMAIEPGR bearing pT278.**

“Seq.” denotes the residue in the peptide, “#” denotes the number from the beginning of counting fragment ions of that type. A letter shown in red denotes an assigned phosphosite. “a/b/y calc.” denotes the calculated m/z for the corresponding a/b/y ion. “a/b/y obs.” denotes the observed m/z for the ion, if observed. If a species is not observed the corresponding obs. cell will be empty. “a/b/y delta” denotes the deviation (in m/z) between the calculated and observed species. “b/y++” denotes double charged fragment ions, if not specified fragment ions are single charged. b-18 denotes an ion which has lost a water molecule. For clarity modifications are not explicitly listed in the “Seq” column, but explicitly stated in the table title.



| Seq. | #  | a calc.   | a obs.    | a delta | b calc.   | b obs.    | b delta | b-18 calc. | b-18 obs. | b-18 delta | b++ calc. | b++ obs.  | b++ delta |
|------|----|-----------|-----------|---------|-----------|-----------|---------|------------|-----------|------------|-----------|-----------|-----------|
| Q    | 1  | 101.0709  |           |         | 129.0659  |           |         | 111.0553   |           |            | 65.0366   |           |           |
| A    | 2  | 172.1081  | 172.1109  | 0.0029  | 200.103   | 200.1057  | 0.0027  | 182.0924   | 182.0945  | 0.0021     | 100.5551  |           |           |
| A    | 3  | 243.1452  | 243.1422  | 0.0029  | 271.1401  | 271.1439  | 0.0038  | 253.1295   | 253.13    | 0.0005     | 136.0737  |           |           |
| E    | 4  | 372.1878  | 372.1886  | 0.0008  | 400.1827  | 400.1858  | 0.0031  | 382.1721   | 382.179   | 0.0069     | 200.595   |           |           |
| Q    | 5  | 500.2463  |           |         | 528.2412  | 528.2462  | 0.005   | 510.2307   | 510.2366  | 0.0059     | 264.6243  |           |           |
| G    | 6  | 557.2678  |           |         | 585.2627  | 585.2724  | 0.0097  | 567.2521   | 567.2588  | 0.0067     | 293.135   |           |           |
| Q    | 7  | 685.3264  | 685.3116  | 0.0147  | 713.3213  | 713.33    | 0.0087  | 695.3107   | 695.3172  | 0.0065     | 357.1643  |           |           |
| V    | 8  | 784.3948  |           |         | 812.3897  | 812.4023  | 0.0126  | 794.3791   |           |            | 406.6985  |           |           |
| C    | 9  | 944.4254  |           |         | 972.4203  | 972.4204  | 0.0001  | 954.4098   | 954.422   | 0.0123     | 486.7138  |           |           |
| T    | 10 | 1125.4394 |           |         | 1153.4344 |           |         | 1135.4238  |           |            | 577.2208  |           |           |
| V    | 11 | 1224.5078 |           |         | 1252.5028 | 1252.5396 | 0.0369  | 1234.4922  | 1234.5047 | 0.0125     | 626.755   |           |           |
| G    | 12 | 1281.5293 | 1281.5031 | 0.0262  | 1309.5242 | 1309.5281 | 0.0038  | 1291.5137  | 1291.5183 | 0.0046     | 655.2657  |           |           |
| G    | 13 | 1338.5508 |           |         | 1366.5457 |           |         | 1348.5351  |           |            | 683.7765  |           |           |
| E    | 14 | 1467.5934 |           |         | 1495.5883 |           |         | 1477.5777  |           |            | 748.2978  |           |           |
| H    | 15 | 1604.6523 |           |         | 1632.6472 |           |         | 1614.6366  |           |            | 816.8272  | 816.8347  | 0.0075    |
| S    | 16 | 1771.6506 |           |         | 1799.6455 |           |         | 1781.635   |           |            | 900.3264  |           |           |
| T    | 17 | 1872.6983 |           |         | 1900.6932 |           |         | 1882.6827  |           |            | 950.8502  |           |           |
| F    | 18 | 2019.7667 |           |         | 2047.7616 |           |         | 2029.7511  |           |            | 1024.3845 |           |           |
| S    | 19 | 2106.7987 |           |         | 2134.7937 |           |         | 2116.7831  |           |            | 1067.9005 |           |           |
| M    | 20 | 2237.8392 |           |         | 2265.8341 |           |         | 2247.8236  |           |            | 1133.4207 |           |           |
| A    | 21 | 2308.8763 |           |         | 2336.8713 |           |         | 2318.8607  |           |            | 1168.9393 | 1168.9504 | 0.0111    |
| I    | 22 | 2421.9604 |           |         | 2449.9553 |           |         | 2431.9447  |           |            | 1225.4813 | 1225.5015 | 0.0202    |
| E    | 23 | 2551.003  |           |         | 2578.9979 |           |         | 2560.9873  |           |            | 1290.0026 | 1290.0082 | 0.0056    |
| P    | 24 | 2648.0557 |           |         | 2676.0507 |           |         | 2658.0401  |           |            | 1338.529  |           |           |
| G    | 25 | 2705.0772 |           |         | 2733.0721 |           |         | 2715.0616  |           |            | 1367.0397 |           |           |
| R    | 26 |           |           |         |           |           |         |            |           |            |           |           |           |

**Supplementary Table 16: a and b ions observed for peptide**

**QAAEQGQVC(carbamidomethyl)T(phospho)VGGEHS(phospho)TFSMAIEPGR doubly phosphorylated at positions T278 and S284.**

“Seq.” denotes the residue in the peptide, “#” denotes the number from the beginning of counting fragment ions of that type. A letter shown in red denotes an assigned phosphosite. “a/b/y calc.” denotes the calculated m/z for the corresponding a/b/y ion. “a/b/y obs.” denotes the observed m/z for the ion, if observed. If a species is not observed the corresponding obs. cell will be empty. “a/b/y delta” denotes the deviation (in m/z) between the calculated and observed species. “b/y++” denotes double charged fragment ions, if not specified fragment ions are single charged. b-18 denotes an ion which has lost a water molecule. For clarity modifications are not explicitly listed in the “Seq” column, but explicitly stated in the table title.

| Seq. | y calc.   | y obs.    | y delta | y++ calc. | y++ obs.  | y++ delta | #  |
|------|-----------|-----------|---------|-----------|-----------|-----------|----|
| Q    |           |           |         |           |           |           | 26 |
| A    | 2779.1252 |           |         | 1390.0662 |           |           | 25 |
| A    | 2708.0881 |           |         | 1354.5477 | 1354.5583 | 0.0106    | 24 |
| E    | 2637.051  |           |         | 1319.0291 | 1319.0391 | 0.0099    | 23 |
| Q    | 2508.0084 |           |         | 1254.5078 | 1254.524  | 0.0162    | 22 |
| G    | 2379.9498 |           |         | 1190.4786 | 1190.4948 | 0.0163    | 21 |
| Q    | 2322.9284 |           |         | 1161.9678 | 1161.9849 | 0.0171    | 20 |
| V    | 2194.8698 |           |         | 1097.9385 | 1097.9546 | 0.0161    | 19 |
| C    | 2095.8014 |           |         | 1048.4043 | 1048.4191 | 0.0148    | 18 |
| T    | 1935.7707 |           |         | 968.389   | 968.4005  | 0.0115    | 17 |
| V    | 1754.7567 |           |         | 877.882   | 877.8923  | 0.0103    | 16 |
| G    | 1655.6883 |           |         | 828.3478  | 828.3573  | 0.0095    | 15 |
| G    | 1598.6669 |           |         | 799.8371  | 799.849   | 0.0119    | 14 |
| E    | 1541.6454 |           |         | 771.3263  |           |           | 13 |
| H    | 1412.6028 |           |         | 706.805   | 706.8179  | 0.0129    | 12 |
| S    | 1275.5439 | 1275.5557 | 0.0119  | 638.2756  |           |           | 11 |
| T    | 1108.5455 | 1108.5495 | 0.004   | 554.7764  |           |           | 10 |
| F    | 1007.4979 | 1007.5095 | 0.0116  | 504.2526  |           |           | 9  |
| S    | 860.4294  | 860.4367  | 0.0073  | 430.7184  |           |           | 8  |
| M    | 773.3974  | 773.4089  | 0.0115  | 387.2023  |           |           | 7  |
| A    | 642.3569  | 642.3643  | 0.0074  | 321.6821  |           |           | 6  |
| I    | 571.3198  | 571.3279  | 0.0081  | 286.1635  |           |           | 5  |
| E    | 458.2358  | 458.2395  | 0.0038  | 229.6215  |           |           | 4  |
| P    | 329.1932  | 329.1935  | 0.0004  | 165.1002  |           |           | 3  |
| G    | 232.1404  | 232.1451  | 0.0047  | 116.5738  |           |           | 2  |
| R    | 175.119   | 175.1207  | 0.0018  | 88.0631   |           |           | 1  |

**Supplementary Table 17: y ions observed for peptide**

**QAAEQGQVC(carbamidomethyl)T(phospho)VGGEHS(phospho)TFSMAIEPGR doubly phosphorylated at positions T278 and S284.**

“Seq.” denotes the residue in the peptide, “#” denotes the number from the beginning of counting fragment ions of that type. A letter shown in red denotes an assigned phosphosite. “a/b/y calc.” denotes the calculated m/z for the corresponding a/b/y ion. “a/b/y obs.” denotes the observed m/z for the ion, if observed. If a species is not observed the corresponding obs. cell will be empty. “a/b/y delta” denotes the deviation (in m/z) between the calculated and observed species. “b/y++” denotes double charged fragment ions, if not specified fragment ions are single charged. b-18 denotes an ion which has lost a water molecule. For clarity modifications are not explicitly listed in the “Seq” column, but explicitly stated in the table title.

| Seq. | #  | a calc.   | a obs.    | a delta | b calc.   | b obs.   | b delta | b-18 calc. | b-18 obs. | b-18 delta | b++ calc. | b++ obs.  | b++ delta |
|------|----|-----------|-----------|---------|-----------|----------|---------|------------|-----------|------------|-----------|-----------|-----------|
| Q    | 1  | 101.0709  |           |         | 129.0659  | 129.0702 | 0.0044  | 111.0553   |           |            | 65.0366   |           |           |
| A    | 2  | 172.1081  | 172.1102  | 0.0021  | 200.103   | 200.1056 | 0.0027  | 182.0924   | 182.0941  | 0.0017     | 100.5551  |           |           |
| A    | 3  | 243.1452  | 243.1417  | 0.0035  | 271.1401  | 271.1419 | 0.0019  | 253.1295   | 253.1323  | 0.0028     | 136.0737  |           |           |
| E    | 4  | 372.1878  | 372.1915  | 0.0038  | 400.1827  | 400.1874 | 0.0047  | 382.1721   | 382.174   | 0.0019     | 200.595   |           |           |
| Q    | 5  | 500.2463  |           |         | 528.2412  | 528.2496 | 0.0083  | 510.2307   | 510.2387  | 0.008      | 264.6243  |           |           |
| G    | 6  | 557.2678  |           |         | 585.2627  | 585.2669 | 0.0042  | 567.2521   | 567.2588  | 0.0067     | 293.135   |           |           |
| Q    | 7  | 685.3264  | 685.302   | 0.0243  | 713.3213  | 713.3193 | -0.002  | 695.3107   |           |            | 357.1643  |           |           |
| V    | 8  | 784.3948  | 784.4024  | 0.0076  | 812.3897  | 812.3997 | 0.01    | 794.3791   |           |            | 406.6985  |           |           |
| C    | 9  | 944.4254  |           |         | 972.4203  | 972.4428 | 0.0225  | 954.4098   | 954.4238  | 0.0141     | 486.7138  |           |           |
| T    | 10 | 1125.4394 |           |         | 1153.4344 |          |         | 1135.4238  |           |            | 577.2208  |           |           |
| V    | 11 | 1224.5078 |           |         | 1252.5028 |          |         | 1234.4922  | 1234.5038 | 0.0116     | 626.755   |           |           |
| G    | 12 | 1281.5293 | 1281.5416 | 0.0123  | 1309.5242 |          |         | 1291.5137  | 1291.4994 | 0.0142     | 655.2657  |           |           |
| G    | 13 | 1338.5508 |           |         | 1366.5457 |          |         | 1348.5351  |           |            | 683.7765  |           |           |
| E    | 14 | 1467.5934 |           |         | 1495.5883 |          |         | 1477.5777  |           |            | 748.2978  |           |           |
| H    | 15 | 1604.6523 |           |         | 1632.6472 |          |         | 1614.6366  |           |            | 816.8272  |           |           |
| S    | 16 | 1691.6843 |           |         | 1719.6792 |          |         | 1701.6686  |           |            | 860.3432  |           |           |
| T    | 17 | 1872.6983 |           |         | 1900.6932 |          |         | 1882.6827  |           |            | 950.8502  |           |           |
| F    | 18 | 2019.7667 |           |         | 2047.7616 |          |         | 2029.7511  |           |            | 1024.3845 |           |           |
| S    | 19 | 2106.7987 |           |         | 2134.7937 |          |         | 2116.7831  |           |            | 1067.9005 |           |           |
| M    | 20 | 2237.8392 |           |         | 2265.8341 |          |         | 2247.8236  |           |            | 1133.4207 |           |           |
| A    | 21 | 2308.8763 |           |         | 2336.8713 |          |         | 2318.8607  |           |            | 1168.9393 |           |           |
| I    | 22 | 2421.9604 |           |         | 2449.9553 |          |         | 2431.9447  |           |            | 1225.4813 |           |           |
| E    | 23 | 2551.003  |           |         | 2578.9979 |          |         | 2560.9873  |           |            | 1290.0026 | 1290.0201 | 0.0175    |
| P    | 24 | 2648.0557 |           |         | 2676.0507 |          |         | 2658.0401  |           |            | 1338.529  |           |           |
| G    | 25 | 2705.0772 |           |         | 2733.0721 |          |         | 2715.0616  |           |            | 1367.0397 |           |           |
| R    | 26 |           |           |         |           |          |         |            |           |            |           |           |           |

**Supplementary Table 18: a and b ions observed for peptide**

**QAAEQGQVC(carbamidomethyl)T(phospho)VGGEHST(phospho)FSMAIEPGR doubly phosphorylated at positions T278 and T285.**

“Seq.” denotes the residue in the peptide, “#” denotes the number from the beginning of counting fragment ions of that type. A letter shown in red denotes an assigned phosphosite. “a/b/y calc.” denotes the calculated m/z for the corresponding a/b/y ion. “a/b/y obs.” denotes the observed m/z for the ion, if observed. If a species is not observed the corresponding obs. cell will be empty. “a/b/y delta” denotes the deviation (in m/z) between the calculated and observed species. “b/y++” denotes double charged fragment ions, if not specified fragment ions are single charged. b-18 denotes an ion which has lost a water molecule. For clarity modifications are not explicitly listed in the “Seq” column, but explicitly stated in the table title.

| Seq. | y calc.   | y obs.    | y delta | y++ calc. | y++ obs.  | y++ delta | #  |
|------|-----------|-----------|---------|-----------|-----------|-----------|----|
| Q    |           |           |         |           |           |           | 26 |
| A    | 2779.1252 |           |         | 1390.0662 |           |           | 25 |
| A    | 2708.0881 |           |         | 1354.5477 | 1354.5727 | 0.025     | 24 |
| E    | 2637.051  |           |         | 1319.0291 | 1319.0592 | 0.03      | 23 |
| Q    | 2508.0084 |           |         | 1254.5078 | 1254.5228 | 0.015     | 22 |
| G    | 2379.9498 |           |         | 1190.4786 | 1190.4882 | 0.0097    | 21 |
| Q    | 2322.9284 |           |         | 1161.9678 | 1161.9762 | 0.0083    | 20 |
| V    | 2194.8698 |           |         | 1097.9385 | 1097.9495 | 0.0109    | 19 |
| C    | 2095.8014 |           |         | 1048.4043 | 1048.4097 | 0.0054    | 18 |
| T    | 1935.7707 |           |         | 968.389   | 968.4029  | 0.0139    | 17 |
| V    | 1754.7567 |           |         | 877.882   | 877.8934  | 0.0114    | 16 |
| G    | 1655.6883 |           |         | 828.3478  | 828.3576  | 0.0098    | 15 |
| G    | 1598.6669 |           |         | 799.8371  | 799.8455  | 0.0085    | 14 |
| E    | 1541.6454 |           |         | 771.3263  |           |           | 13 |
| H    | 1412.6028 |           |         | 706.805   | 706.8187  | 0.0136    | 12 |
| S    | 1275.5439 | 1275.5034 | -0.0404 | 638.2756  |           |           | 11 |
| T    | 1188.5119 |           |         | 594.7596  |           |           | 10 |
| F    | 1007.4979 | 1007.4996 | 0.0018  | 504.2526  |           |           | 9  |
| S    | 860.4294  | 860.4403  | 0.0109  | 430.7184  |           |           | 8  |
| M    | 773.3974  | 773.4003  | 0.0029  | 387.2023  |           |           | 7  |
| A    | 642.3569  | 642.3621  | 0.0051  | 321.6821  |           |           | 6  |
| I    | 571.3198  | 571.3249  | 0.0051  | 286.1635  |           |           | 5  |
| E    | 458.2358  | 458.2397  | 0.004   | 229.6215  |           |           | 4  |
| P    | 329.1932  | 329.1963  | 0.0031  | 165.1002  |           |           | 3  |
| G    | 232.1404  | 232.147   | 0.0066  | 116.5738  |           |           | 2  |
| R    | 175.119   | 175.1192  | 0.0003  | 88.0631   |           |           | 1  |

**Supplementary Table 19: y ions observed for peptide**

**QAAEQGQVC(carbamidomethyl)T(phospho)VGGEHST(phospho)FSMAIEPGR doubly phosphorylated at positions T278 and T285.**

“Seq.” denotes the residue in the peptide, “#” denotes the number from the beginning of counting fragment ions of that type. A letter shown in red denotes an assigned phosphosite. “a/b/y calc.” denotes the calculated m/z for the corresponding a/b/y ion. “a/b/y obs.” denotes the observed m/z for the ion, if observed. If a species is not observed the corresponding obs. cell will be empty. “a/b/y delta” denotes the deviation (in m/z) between the calculated and observed species. “b/y++” denotes double charged fragment ions, if not specified fragment ions are single charged. b-18 denotes an ion which has lost a water molecule. For clarity modifications are not explicitly listed in the “Seq” column, but explicitly stated in the table title.

| Seq. | #  | a calc.   | a obs.   | a delta | b calc.   | b obs.   | b delta | b-18 calc. | b-18 obs. | b-18 delta | b++ calc. | b++ obs. | b++ delta |
|------|----|-----------|----------|---------|-----------|----------|---------|------------|-----------|------------|-----------|----------|-----------|
| Q    | 1  | 101.0709  |          |         | 129.0659  |          |         | 111.0553   |           |            | 65.0366   |          |           |
| A    | 2  | 172.1081  | 172.1114 | 0.0034  | 200.103   | 200.1055 | 0.0025  | 182.0924   | 182.0949  | 0.0025     | 100.5551  |          |           |
| A    | 3  | 243.1452  | 243.1477 | 0.0025  | 271.1401  | 271.1437 | 0.0037  | 253.1295   | 253.1303  | 0.0008     | 136.0737  |          |           |
| E    | 4  | 372.1878  |          |         | 400.1827  | 400.1873 | 0.0046  | 382.1721   | 382.1825  | 0.0104     | 200.595   |          |           |
| Q    | 5  | 500.2463  | 500.2662 | 0.0199  | 528.2412  | 528.2461 | 0.0048  | 510.2307   | 510.2164  | 0.0143     | 264.6243  |          |           |
| G    | 6  | 557.2678  |          |         | 585.2627  | 585.2714 | 0.0087  | 567.2521   | 567.2699  | 0.0178     | 293.135   |          |           |
| Q    | 7  | 685.3264  |          |         | 713.3213  | 713.3242 | 0.0029  | 695.3107   | 695.3139  | 0.0031     | 357.1643  |          |           |
| V    | 8  | 784.3948  |          |         | 812.3897  | 812.3953 | 0.0056  | 794.3791   | 794.3929  | 0.0138     | 406.6985  |          |           |
| C    | 9  | 944.4254  |          |         | 972.4203  | 972.4295 | 0.0092  | 954.4098   | 954.4274  | 0.0176     | 486.7138  |          |           |
| T    | 10 | 1125.4394 |          |         | 1153.4344 |          |         | 1135.4238  |           |            | 577.2208  |          |           |
| V    | 11 | 1224.5078 |          |         | 1252.5028 |          |         | 1234.4922  |           |            | 626.755   |          |           |
| G    | 12 | 1281.5293 |          |         | 1309.5242 |          |         | 1291.5137  |           |            | 655.2657  |          |           |
| G    | 13 | 1338.5508 |          |         | 1366.5457 |          |         | 1348.5351  |           |            | 683.7765  |          |           |
| E    | 14 | 1467.5934 |          |         | 1495.5883 |          |         | 1477.5777  |           |            | 748.2978  |          |           |
| H    | 15 | 1604.6523 |          |         | 1632.6472 |          |         | 1614.6366  |           |            | 816.8272  | 816.839  | 0.0118    |
| S    | 16 | 1691.6843 |          |         | 1719.6792 |          |         | 1701.6686  |           |            | 860.3432  |          |           |
| T    | 17 | 1792.732  |          |         | 1820.7269 |          |         | 1802.7163  |           |            | 910.8671  |          |           |
| F    | 18 | 1939.8004 |          |         | 1967.7953 |          |         | 1949.7847  |           |            | 984.4013  | 984.4201 | 0.0189    |
| S    | 19 | 2106.7987 |          |         | 2134.7937 |          |         | 2116.7831  |           |            | 1067.9005 |          |           |
| M    | 20 | 2237.8392 |          |         | 2265.8341 |          |         | 2247.8236  |           |            | 1133.4207 |          |           |
| A    | 21 | 2308.8763 |          |         | 2336.8713 |          |         | 2318.8607  |           |            | 1168.9393 |          |           |
| I    | 22 | 2421.9604 |          |         | 2449.9553 |          |         | 2431.9447  |           |            | 1225.4813 |          |           |
| E    | 23 | 2551.003  |          |         | 2578.9979 |          |         | 2560.9873  |           |            | 1290.0026 |          |           |
| P    | 24 | 2648.0557 |          |         | 2676.0507 |          |         | 2658.0401  |           |            | 1338.529  |          |           |
| G    | 25 | 2705.0772 |          |         | 2733.0721 |          |         | 2715.0616  |           |            | 1367.0397 |          |           |
| R    | 26 |           |          |         |           |          |         |            |           |            |           |          |           |

**Supplementary Table 20: a and b ions observed for peptide**

**QAAEQGQVC(carbamidomethyl)T(phospho)VGGEHSTFS(phospho)MAIEPGR doubly phosphorylated at positions T278 and S287.**

“Seq.” denotes the residue in the peptide, “#” denotes the number from the beginning of counting fragment ions of that type. A letter shown in red denotes an assigned phosphosite. “a/b/y calc.” denotes the calculated m/z for the corresponding a/b/y ion. “a/b/y obs.” denotes the observed m/z for the ion, if observed. If a species is not observed the corresponding obs. cell will be empty. “a/b/y delta” denotes the deviation (in m/z) between the calculated and observed species. “b/y++” denotes double charged fragment ions, if not specified fragment ions are single charged. b-18 denotes an ion which has lost a water molecule. For clarity modifications are not explicitly listed in the “Seq” column, but explicitly stated in the table title.

| Seq. | y calc.   | y obs.    | y delta | y++ calc. | y++ obs.  | y++ delta | #  |
|------|-----------|-----------|---------|-----------|-----------|-----------|----|
| Q    |           |           |         |           |           |           | 26 |
| A    | 2779.1252 |           |         | 1390.0662 |           |           | 25 |
| A    | 2708.0881 |           |         | 1354.5477 |           |           | 24 |
| E    | 2637.051  |           |         | 1319.0291 | 1319.0292 | 0.0001    | 23 |
| Q    | 2508.0084 |           |         | 1254.5078 |           |           | 22 |
| G    | 2379.9498 |           |         | 1190.4786 | 1190.4911 | 0.0126    | 21 |
| Q    | 2322.9284 |           |         | 1161.9678 |           |           | 20 |
| V    | 2194.8698 |           |         | 1097.9385 | 1097.9421 | 0.0036    | 19 |
| C    | 2095.8014 |           |         | 1048.4043 | 1048.4091 | 0.0047    | 18 |
| T    | 1935.7707 |           |         | 968.389   | 968.4089  | 0.0198    | 17 |
| V    | 1754.7567 |           |         | 877.882   |           |           | 16 |
| G    | 1655.6883 |           |         | 828.3478  | 828.3606  | 0.0128    | 15 |
| G    | 1598.6669 |           |         | 799.8371  |           |           | 14 |
| E    | 1541.6454 |           |         | 771.3263  |           |           | 13 |
| H    | 1412.6028 |           |         | 706.805   |           |           | 12 |
| S    | 1275.5439 | 1275.5716 | 0.0277  | 638.2756  |           |           | 11 |
| T    | 1188.5119 |           |         | 594.7596  |           |           | 10 |
| F    | 1087.4642 | 1087.4858 | 0.0216  | 544.2357  |           |           | 9  |
| S    | 940.3958  | 940.3987  | 0.003   | 470.7015  |           |           | 8  |
| M    | 773.3974  | 773.3971  | -0.0003 | 387.2023  |           |           | 7  |
| A    | 642.3569  | 642.3645  | 0.0076  | 321.6821  |           |           | 6  |
| I    | 571.3198  | 571.3329  | 0.0131  | 286.1635  |           |           | 5  |
| E    | 458.2358  | 458.2412  | 0.0055  | 229.6215  |           |           | 4  |
| P    | 329.1932  | 329.1924  | -0.0008 | 165.1002  |           |           | 3  |
| G    | 232.1404  | 232.136   | -0.0044 | 116.5738  |           |           | 2  |
| R    | 175.119   | 175.1207  | 0.0017  | 88.0631   |           |           | 1  |

**Supplementary Table 21: y ions observed for peptide**

**QAAEQGQVC(carbamidomethyl)T(phospho)VGGEHSTFS(phospho)MAIEPGR doubly phosphorylated at positions T278 and S287.**

“Seq.” denotes the residue in the peptide, “#” denotes the number from the beginning of counting fragment ions of that type. A letter shown in red denotes an assigned phosphosite. “a/b/y calc.” denotes the calculated m/z for the corresponding a/b/y ion. “a/b/y obs.” denotes the observed m/z for the ion, if observed. If a species is not observed the corresponding obs. cell will be empty. “a/b/y delta” denotes the deviation (in m/z) between the calculated and observed species. “b/y++” denotes double charged fragment ions, if not specified fragment ions are single charged. b-18 denotes an ion which has lost a water molecule. For clarity modifications are not explicitly listed in the “Seq” column, but explicitly stated in the table title.

| Seq. | #  | a calc.   | a obs.    | a delta | b calc.   | b obs.    | b delta | b-18 calc. | b-18 obs. | b-18 delta | b++ calc. | b++ obs. | b++ delta |
|------|----|-----------|-----------|---------|-----------|-----------|---------|------------|-----------|------------|-----------|----------|-----------|
| Q    | 1  | 101.0709  |           |         | 129.0659  |           |         | 111.0553   |           |            | 65.0366   |          |           |
| A    | 2  | 172.1081  | 172.1119  | 0.0038  | 200.103   | 200.1067  | 0.0037  | 182.0924   | 182.0939  | 0.0015     | 100.5551  |          |           |
| A    | 3  | 243.1452  | 243.138   | 0.0072  | 271.1401  | 271.1443  | 0.0043  | 253.1295   | 253.1322  | 0.0027     | 136.0737  |          |           |
| E    | 4  | 372.1878  | 372.1974  | 0.0097  | 400.1827  | 400.1843  | 0.0016  | 382.1721   | 382.1757  | 0.0036     | 200.595   |          |           |
| Q    | 5  | 500.2463  |           |         | 528.2412  | 528.2466  | 0.0054  | 510.2307   |           |            | 264.6243  |          |           |
| G    | 6  | 557.2678  |           |         | 585.2627  | 585.2737  | 0.011   | 567.2521   | 567.2649  | 0.0128     | 293.135   |          |           |
| Q    | 7  | 685.3264  |           |         | 713.3213  | 713.3257  | 0.0044  | 695.3107   |           |            | 357.1643  |          |           |
| V    | 8  | 784.3948  | 784.3636  | 0.0312  | 812.3897  | 812.3923  | 0.0026  | 794.3791   | 794.3883  | 0.0092     | 406.6985  |          |           |
| C    | 9  | 944.4254  | 944.4099  | 0.0156  | 972.4203  | 972.4509  | 0.0306  | 954.4098   | 954.422   | 0.0122     | 486.7138  |          |           |
| T    | 10 | 1045.4731 |           |         | 1073.468  |           |         | 1055.4575  |           |            | 537.2376  |          |           |
| V    | 11 | 1144.5415 | 1144.5302 | 0.0113  | 1172.5364 |           |         | 1154.5259  | 1154.5135 | 0.0124     | 586.7719  |          |           |
| G    | 12 | 1201.563  |           |         | 1229.5579 | 1229.5873 | 0.0294  | 1211.5473  |           |            | 615.2826  |          |           |
| G    | 13 | 1258.5844 |           |         | 1286.5794 |           |         | 1268.5688  |           |            | 643.7933  |          |           |
| E    | 14 | 1387.627  |           |         | 1415.6219 |           |         | 1397.6114  |           |            | 708.3146  |          |           |
| H    | 15 | 1524.6859 |           |         | 1552.6809 |           |         | 1534.6703  |           |            | 776.8441  |          |           |
| S    | 16 | 1691.6843 |           |         | 1719.6792 |           |         | 1701.6686  |           |            | 860.3432  |          |           |
| T    | 17 | 1872.6983 |           |         | 1900.6932 |           |         | 1882.6827  |           |            | 950.8502  |          |           |
| F    | 18 | 2019.7667 |           |         | 2047.7616 |           |         | 2029.7511  |           |            | 1024.3845 |          |           |
| S    | 19 | 2106.7987 |           |         | 2134.7937 |           |         | 2116.7831  |           |            | 1067.9005 |          |           |
| M    | 20 | 2237.8392 |           |         | 2265.8341 |           |         | 2247.8236  |           |            | 1133.4207 |          |           |
| A    | 21 | 2308.8763 |           |         | 2336.8713 |           |         | 2318.8607  |           |            | 1168.9393 |          |           |
| I    | 22 | 2421.9604 |           |         | 2449.9553 |           |         | 2431.9447  |           |            | 1225.4813 |          |           |
| E    | 23 | 2551.003  |           |         | 2578.9979 |           |         | 2560.9873  |           |            | 1290.0026 |          |           |
| P    | 24 | 2648.0557 |           |         | 2676.0507 |           |         | 2658.0401  |           |            | 1338.529  |          |           |
| G    | 25 | 2705.0772 |           |         | 2733.0721 |           |         | 2715.0616  |           |            | 1367.0397 |          |           |
| R    | 26 |           |           |         |           |           |         |            |           |            |           |          |           |

**Supplementary Table 22: a and b ions observed for peptide**

**QAAEQGQVC(carbamidomethyl)TVGGEHS(phospho)T(phospho)FSMAIEPGR doubly phosphorylated at positions S284 and T285.**

“Seq.” denotes the residue in the peptide, “#” denotes the number from the beginning of counting fragment ions of that type. A letter shown in red denotes an assigned phosphosite. “a/b/y calc.” denotes the calculated m/z for the corresponding a/b/y ion. “a/b/y obs.” denotes the observed m/z for the ion, if observed. If a species is not observed the corresponding obs. cell will be empty. “a/b/y delta” denotes the deviation (in m/z) between the calculated and observed species. “b/y++” denotes double charged fragment ions, if not specified fragment ions are single charged. b-18 denotes an ion which has lost a water molecule. For clarity modifications are not explicitly listed in the “Seq” column, but explicitly stated in the table title.

| Seq. | y calc.   | y obs.   | y delta | y++ calc. | y++ obs.  | y++ delta | #  |
|------|-----------|----------|---------|-----------|-----------|-----------|----|
| Q    |           |          |         |           |           |           | 26 |
| A    | 2779.1252 |          |         | 1390.0662 |           |           | 25 |
| A    | 2708.0881 |          |         | 1354.5477 | 1354.5805 | 0.0328    | 24 |
| E    | 2637.051  |          |         | 1319.0291 |           |           | 23 |
| Q    | 2508.0084 |          |         | 1254.5078 | 1254.5352 | 0.0274    | 22 |
| G    | 2379.9498 |          |         | 1190.4786 | 1190.4955 | 0.017     | 21 |
| Q    | 2322.9284 |          |         | 1161.9678 |           |           | 20 |
| V    | 2194.8698 |          |         | 1097.9385 |           |           | 19 |
| C    | 2095.8014 |          |         | 1048.4043 | 1048.4329 | 0.0286    | 18 |
| T    | 1935.7707 |          |         | 968.389   | 968.4002  | 0.0112    | 17 |
| V    | 1834.7231 |          |         | 917.8652  |           |           | 16 |
| G    | 1735.6546 |          |         | 868.331   | 868.3379  | 0.0069    | 15 |
| G    | 1678.6332 |          |         | 839.8202  |           |           | 14 |
| E    | 1621.6117 |          |         | 811.3095  |           |           | 13 |
| H    | 1492.5691 |          |         | 746.7882  | 746.7955  | 0.0073    | 12 |
| S    | 1355.5102 |          |         | 678.2587  |           |           | 11 |
| T    | 1188.5119 |          |         | 594.7596  |           |           | 10 |
| F    | 1007.4979 |          |         | 504.2526  |           |           | 9  |
| S    | 860.4294  | 860.4333 | 0.0039  | 430.7184  |           |           | 8  |
| M    | 773.3974  | 773.3897 | -0.0077 | 387.2023  |           |           | 7  |
| A    | 642.3569  | 642.3648 | 0.0079  | 321.6821  |           |           | 6  |
| I    | 571.3198  | 571.3242 | 0.0044  | 286.1635  |           |           | 5  |
| E    | 458.2358  | 458.2394 | 0.0036  | 229.6215  |           |           | 4  |
| P    | 329.1932  | 329.1958 | 0.0026  | 165.1002  |           |           | 3  |
| G    | 232.1404  |          |         | 116.5738  |           |           | 2  |
| R    | 175.119   | 175.1206 | 0.0017  | 88.0631   |           |           | 1  |

**Supplementary Table 23: y ions observed for peptide**

**QAAEQGQVC(carbamidomethyl)TVGGEHS(phospho)T(phospho)FSMAIEPGR doubly phosphorylated at positions S284 and T285.**

“Seq.” denotes the residue in the peptide, “#” denotes the number from the beginning of counting fragment ions of that type. A letter shown in red denotes an assigned phosphosite. “a/b/y calc.” denotes the calculated m/z for the corresponding a/b/y ion. “a/b/y obs.” denotes the observed m/z for the ion, if observed. If a species is not observed the corresponding obs. cell will be empty. “a/b/y delta” denotes the deviation (in m/z) between the calculated and observed species. “b/y++” denotes double charged fragment ions, if not specified fragment ions are single charged. b-18 denotes an ion which has lost a water molecule. For clarity modifications are not explicitly listed in the “Seq” column, but explicitly stated in the table title.



| Seq. | #  | a calc.   | a obs.   | a delta | b calc.   | b obs.   | b delta | b-18 calc. | b-18 obs. | b-18 delta | b++ calc. | b++ obs. | b++ delta |
|------|----|-----------|----------|---------|-----------|----------|---------|------------|-----------|------------|-----------|----------|-----------|
| Q    | 1  | 101.0709  |          |         | 129.0659  | 129.0657 | 0.0002  | 111.0553   |           |            | 65.0366   |          |           |
| A    | 2  | 172.1081  | 172.1107 | 0.0027  | 200.103   | 200.1061 | 0.0031  | 182.0924   | 182.0952  | 0.0028     | 100.5551  |          |           |
| A    | 3  | 243.1452  | 243.1444 | 0.0008  | 271.1401  | 271.1424 | 0.0023  | 253.1295   | 253.132   | 0.0025     | 136.0737  |          |           |
| E    | 4  | 372.1878  |          |         | 400.1827  | 400.1854 | 0.0027  | 382.1721   | 382.179   | 0.0069     | 200.595   |          |           |
| Q    | 5  | 500.2463  |          |         | 528.2412  | 528.2495 | 0.0083  | 510.2307   | 510.2407  | 0.01       | 264.6243  |          |           |
| G    | 6  | 557.2678  |          |         | 585.2627  | 585.2649 | 0.0022  | 567.2521   | 567.2658  | 0.0137     | 293.135   |          |           |
| Q    | 7  | 685.3264  | 685.3281 | 0.0017  | 713.3213  | 713.3295 | 0.0082  | 695.3107   | 695.3177  | 0.0069     | 357.1643  |          |           |
| V    | 8  | 784.3948  | 784.3993 | 0.0045  | 812.3897  | 812.3951 | 0.0054  | 794.3791   | 794.3836  | 0.0045     | 406.6985  |          |           |
| C    | 9  | 944.4254  |          |         | 972.4203  |          |         | 954.4098   | 954.4183  | 0.0085     | 486.7138  |          |           |
| T    | 10 | 1045.4731 |          |         | 1073.468  |          |         | 1055.4575  |           |            | 537.2376  |          |           |
| V    | 11 | 1144.5415 |          |         | 1172.5364 |          |         | 1154.5259  | 1154.4877 | 0.0382     | 586.7719  |          |           |
| G    | 12 | 1201.563  |          |         | 1229.5579 |          |         | 1211.5473  |           |            | 615.2826  |          |           |
| G    | 13 | 1258.5844 |          |         | 1286.5794 |          |         | 1268.5688  |           |            | 643.7933  |          |           |
| E    | 14 | 1387.627  |          |         | 1415.6219 |          |         | 1397.6114  |           |            | 708.3146  |          |           |
| H    | 15 | 1524.6859 |          |         | 1552.6809 |          |         | 1534.6703  |           |            | 776.8441  | 776.8582 | 0.0141    |
| S    | 16 | 1691.6843 |          |         | 1719.6792 |          |         | 1701.6686  |           |            | 860.3432  |          |           |
| T    | 17 | 1792.732  |          |         | 1820.7269 |          |         | 1802.7163  |           |            | 910.8671  |          |           |
| F    | 18 | 1939.8004 |          |         | 1967.7953 |          |         | 1949.7847  |           |            | 984.4013  |          |           |
| S    | 19 | 2106.7987 |          |         | 2134.7937 |          |         | 2116.7831  |           |            | 1067.9005 |          |           |
| M    | 20 | 2237.8392 |          |         | 2265.8341 |          |         | 2247.8236  |           |            | 1133.4207 |          |           |
| A    | 21 | 2308.8763 |          |         | 2336.8713 |          |         | 2318.8607  |           |            | 1168.9393 |          |           |
| I    | 22 | 2421.9604 |          |         | 2449.9553 |          |         | 2431.9447  |           |            | 1225.4813 |          |           |
| E    | 23 | 2551.003  |          |         | 2578.9979 |          |         | 2560.9873  |           |            | 1290.0026 |          |           |
| P    | 24 | 2648.0557 |          |         | 2676.0507 |          |         | 2658.0401  |           |            | 1338.529  |          |           |
| G    | 25 | 2705.0772 |          |         | 2733.0721 |          |         | 2715.0616  |           |            | 1367.0397 |          |           |
| R    | 26 |           |          |         |           |          |         |            |           |            |           |          |           |

**Supplementary Table 24: a and b ions observed for peptide**

**QAAEQGQVC(carbamidomethyl)TVGGEHS(phospho)TFS(phospho)MAIEPGR doubly phosphorylated at positions S284 and S287.**

“Seq.” denotes the residue in the peptide, “#” denotes the number from the beginning of counting fragment ions of that type. A letter shown in red denotes an assigned phosphosite. “a/b/y calc.” denotes the calculated m/z for the corresponding a/b/y ion. “a/b/y obs.” denotes the observed m/z for the ion, if observed. If a species is not observed the corresponding obs. cell will be empty. “a/b/y delta” denotes the deviation (in m/z) between the calculated and observed species. “b/y++” denotes double charged fragment ions, if not specified fragment ions are single charged. b-18 denotes an ion which has lost a water molecule. For clarity modifications are not explicitly listed in the “Seq” column, but explicitly stated in the table title.

| Seq. | y calc.   | y obs.    | y delta | y++ calc. | y++ obs.  | y++ delta | #  |
|------|-----------|-----------|---------|-----------|-----------|-----------|----|
| Q    |           |           |         |           |           |           | 26 |
| A    | 2779.1252 |           |         | 1390.0662 |           |           | 25 |
| A    | 2708.0881 |           |         | 1354.5477 | 1354.5592 | 0.0115    | 24 |
| E    | 2637.051  |           |         | 1319.0291 | 1319.0398 | 0.0107    | 23 |
| Q    | 2508.0084 |           |         | 1254.5078 | 1254.5241 | 0.0162    | 22 |
| G    | 2379.9498 |           |         | 1190.4786 | 1190.4929 | 0.0144    | 21 |
| Q    | 2322.9284 |           |         | 1161.9678 | 1161.9606 | -0.0072   | 20 |
| V    | 2194.8698 |           |         | 1097.9385 | 1097.9554 | 0.0168    | 19 |
| C    | 2095.8014 |           |         | 1048.4043 | 1048.4169 | 0.0126    | 18 |
| T    | 1935.7707 |           |         | 968.389   | 968.3962  | 0.0072    | 17 |
| V    | 1834.7231 |           |         | 917.8652  |           |           | 16 |
| G    | 1735.6546 |           |         | 868.331   | 868.3417  | 0.0107    | 15 |
| G    | 1678.6332 |           |         | 839.8202  |           |           | 14 |
| E    | 1621.6117 |           |         | 811.3095  |           |           | 13 |
| H    | 1492.5691 |           |         | 746.7882  | 746.7923  | 0.0041    | 12 |
| S    | 1355.5102 |           |         | 678.2587  |           |           | 11 |
| T    | 1188.5119 |           |         | 594.7596  |           |           | 10 |
| F    | 1087.4642 | 1087.4767 | 0.0125  | 544.2357  |           |           | 9  |
| S    | 940.3958  | 940.4063  | 0.0105  | 470.7015  |           |           | 8  |
| M    | 773.3974  | 773.4024  | 0.005   | 387.2023  |           |           | 7  |
| A    | 642.3569  | 642.3655  | 0.0085  | 321.6821  |           |           | 6  |
| I    | 571.3198  | 571.3263  | 0.0065  | 286.1635  |           |           | 5  |
| E    | 458.2358  | 458.2404  | 0.0046  | 229.6215  |           |           | 4  |
| P    | 329.1932  | 329.1931  | -0.0001 | 165.1002  |           |           | 3  |
| G    | 232.1404  |           |         | 116.5738  |           |           | 2  |
| R    | 175.119   | 175.1181  | -0.0008 | 88.0631   |           |           | 1  |

**Supplementary Table 25: y ions observed for peptide**

**QAAEQGQVC(carbamidomethyl)TVGGEHS(phospho)TFS(phospho)MAIEPGR doubly phosphorylated at positions S284 and S287.**

“Seq.” denotes the residue in the peptide, “#” denotes the number from the beginning of counting fragment ions of that type. A letter shown in red denotes an assigned phosphosite. “a/b/y calc.” denotes the calculated m/z for the corresponding a/b/y ion. “a/b/y obs.” denotes the observed m/z for the ion, if observed. If a species is not observed the corresponding obs. cell will be empty. “a/b/y delta” denotes the deviation (in m/z) between the calculated and observed species. “b/y++” denotes double charged fragment ions, if not specified fragment ions are single charged. b-18 denotes an ion which has lost a water molecule. For clarity modifications are not explicitly listed in the “Seq” column, but explicitly stated in the table title.

| Seq. | #  | a calc.   | a obs.   | a delta | b calc.   | b obs.    | b delta | b-18 calc. | b-18 obs. | b-18 delta | b++ calc. | b++ obs.  | b++ delta |
|------|----|-----------|----------|---------|-----------|-----------|---------|------------|-----------|------------|-----------|-----------|-----------|
| Q    | 1  | 101.0709  |          |         | 129.0659  |           |         | 111.0553   |           |            | 65.0366   |           |           |
| A    | 2  | 172.1081  | 172.1105 | 0.0024  | 200.103   | 200.1057  | 0.0027  | 182.0924   | 182.0963  | 0.0039     | 100.5551  |           |           |
| A    | 3  | 243.1452  | 243.1437 | 0.0015  | 271.1401  | 271.1407  | 0.0006  | 253.1295   | 253.1339  | 0.0044     | 136.0737  |           |           |
| E    | 4  | 372.1878  |          |         | 400.1827  | 400.1927  | 0.01    | 382.1721   | 382.1799  | 0.0078     | 200.595   |           |           |
| Q    | 5  | 500.2463  |          |         | 528.2412  | 528.2459  | 0.0046  | 510.2307   | 510.2421  | 0.0114     | 264.6243  |           |           |
| G    | 6  | 557.2678  |          |         | 585.2627  | 585.2587  | -0.004  | 567.2521   | 567.2554  | 0.0033     | 293.135   |           |           |
| Q    | 7  | 685.3264  |          |         | 713.3213  | 713.3326  | 0.0113  | 695.3107   | 695.3184  | 0.0077     | 357.1643  |           |           |
| V    | 8  | 784.3948  |          |         | 812.3897  | 812.4002  | 0.0105  | 794.3791   | 794.3884  | 0.0093     | 406.6985  |           |           |
| C    | 9  | 944.4254  |          |         | 972.4203  | 972.4449  | 0.0245  | 954.4098   | 954.4325  | 0.0227     | 486.7138  |           |           |
| T    | 10 | 1045.4731 |          |         | 1073.468  |           |         | 1055.4575  |           |            | 537.2376  |           |           |
| V    | 11 | 1144.5415 |          |         | 1172.5364 | 1172.5553 | 0.0189  | 1154.5259  |           |            | 586.7719  |           |           |
| G    | 12 | 1201.563  |          |         | 1229.5579 |           |         | 1211.5473  |           |            | 615.2826  |           |           |
| G    | 13 | 1258.5844 |          |         | 1286.5794 |           |         | 1268.5688  |           |            | 643.7933  |           |           |
| E    | 14 | 1387.627  |          |         | 1415.6219 |           |         | 1397.6114  |           |            | 708.3146  |           |           |
| H    | 15 | 1524.6859 |          |         | 1552.6809 |           |         | 1534.6703  |           |            | 776.8441  |           |           |
| S    | 16 | 1611.718  |          |         | 1639.7129 |           |         | 1621.7023  |           |            | 820.3601  | 820.3514  | 0.0087    |
| T    | 17 | 1792.732  |          |         | 1820.7269 |           |         | 1802.7163  |           |            | 910.8671  |           |           |
| F    | 18 | 1939.8004 |          |         | 1967.7953 |           |         | 1949.7847  |           |            | 984.4013  |           |           |
| S    | 19 | 2106.7987 |          |         | 2134.7937 |           |         | 2116.7831  |           |            | 1067.9005 |           |           |
| M    | 20 | 2237.8392 |          |         | 2265.8341 |           |         | 2247.8236  |           |            | 1133.4207 |           |           |
| A    | 21 | 2308.8763 |          |         | 2336.8713 |           |         | 2318.8607  |           |            | 1168.9393 |           |           |
| I    | 22 | 2421.9604 |          |         | 2449.9553 |           |         | 2431.9447  |           |            | 1225.4813 | 1225.4528 | 0.0285    |
| E    | 23 | 2551.003  |          |         | 2578.9979 |           |         | 2560.9873  |           |            | 1290.0026 |           |           |
| P    | 24 | 2648.0557 |          |         | 2676.0507 |           |         | 2658.0401  |           |            | 1338.529  |           |           |
| G    | 25 | 2705.0772 |          |         | 2733.0721 |           |         | 2715.0616  |           |            | 1367.0397 |           |           |
| R    | 26 |           |          |         |           |           |         |            |           |            |           |           |           |

**Supplementary Table 26: a and b ions observed for peptide**

**QAAEQGQVC(carbamidomethyl)TVGGEHST(phospho)FS(phospho)MAIEPGR doubly phosphorylated at positions T285 and S287.**

“Seq.” denotes the residue in the peptide, “#” denotes the number from the beginning of counting fragment ions of that type. A letter shown in red denotes an assigned phosphosite. “a/b/y calc.” denotes the calculated m/z for the corresponding a/b/y ion. “a/b/y obs.” denotes the observed m/z for the ion, if observed. If a species is not observed the corresponding obs. cell will be empty. “a/b/y delta” denotes the deviation (in m/z) between the calculated and observed species. “b/y++” denotes double charged fragment ions, if not specified fragment ions are single charged. b-18 denotes an ion which has lost a water molecule. For clarity modifications are not explicitly listed in the “Seq” column, but explicitly stated in the table title.

| Seq. | y calc.   | y obs.   | y delta | y++ calc. | y++ obs.  | y++ delta | #  |
|------|-----------|----------|---------|-----------|-----------|-----------|----|
| Q    |           |          |         |           |           |           | 26 |
| A    | 2779.1252 |          |         | 1390.0662 |           |           | 25 |
| A    | 2708.0881 |          |         | 1354.5477 | 1354.5619 | 0.0142    | 24 |
| E    | 2637.051  |          |         | 1319.0291 |           |           | 23 |
| Q    | 2508.0084 |          |         | 1254.5078 |           |           | 22 |
| G    | 2379.9498 |          |         | 1190.4786 | 1190.4959 | 0.0173    | 21 |
| Q    | 2322.9284 |          |         | 1161.9678 | 1161.9631 | -0.0048   | 20 |
| V    | 2194.8698 |          |         | 1097.9385 | 1097.9552 | 0.0167    | 19 |
| C    | 2095.8014 |          |         | 1048.4043 | 1048.4196 | 0.0153    | 18 |
| T    | 1935.7707 |          |         | 968.389   | 968.3969  | 0.0078    | 17 |
| V    | 1834.7231 |          |         | 917.8652  |           |           | 16 |
| G    | 1735.6546 |          |         | 868.331   |           |           | 15 |
| G    | 1678.6332 |          |         | 839.8202  |           |           | 14 |
| E    | 1621.6117 |          |         | 811.3095  |           |           | 13 |
| H    | 1492.5691 |          |         | 746.7882  | 746.7946  | 0.0064    | 12 |
| S    | 1355.5102 |          |         | 678.2587  |           |           | 11 |
| T    | 1268.4782 |          |         | 634.7427  |           |           | 10 |
| F    | 1087.4642 |          |         | 544.2357  |           |           | 9  |
| S    | 940.3958  | 940.4109 | 0.0151  | 470.7015  |           |           | 8  |
| M    | 773.3974  | 773.4088 | 0.0114  | 387.2023  |           |           | 7  |
| A    | 642.3569  | 642.3699 | 0.013   | 321.6821  | 321.682   | -0.0001   | 6  |
| I    | 571.3198  | 571.3275 | 0.0077  | 286.1635  |           |           | 5  |
| E    | 458.2358  | 458.2412 | 0.0054  | 229.6215  |           |           | 4  |
| P    | 329.1932  | 329.1928 | -0.0004 | 165.1002  |           |           | 3  |
| G    | 232.1404  | 232.1403 | -0.0001 | 116.5738  |           |           | 2  |
| R    | 175.119   | 175.119  | 0.0001  | 88.0631   |           |           | 1  |

**Supplementary Table 27: y ions observed for peptide**

**QAAEQGQVC(carbamidomethyl)TVGGEHST(phospho)FS(phospho)MAIEPGR doubly phosphorylated at positions T285 and S287.**

“Seq.” denotes the residue in the peptide, “#” denotes the number from the beginning of counting fragment ions of that type. A letter shown in red denotes an assigned phosphosite. “a/b/y calc.” denotes the calculated m/z for the corresponding a/b/y ion. “a/b/y obs.” denotes the observed m/z for the ion, if observed. If a species is not observed the corresponding obs. cell will be empty. “a/b/y delta” denotes the deviation (in m/z) between the calculated and observed species. “b/y++” denotes double charged fragment ions, if not specified fragment ions are single charged. b-18 denotes an ion which has lost a water molecule. For clarity modifications are not explicitly listed in the “Seq” column, but explicitly stated in the table title.

| Seq. | # | a calc.  | a obs.   | a delta | b calc.  | b obs.   | b delta | b-18 calc. | b-18 obs. | b-18 delta |
|------|---|----------|----------|---------|----------|----------|---------|------------|-----------|------------|
| R    | 1 | 129.1135 |          |         | 157.1084 | 157.1108 | 0.0024  | 139.0978   |           |            |
| P    | 2 | 226.1662 |          |         | 254.1611 | 254.1626 | 0.0015  | 236.1506   |           |            |
| A    | 3 | 297.2033 | 297.205  | 0.0017  | 325.1983 | 325.2027 | 0.0044  | 307.1877   |           |            |
| F    | 4 | 444.2718 | 444.2782 | 0.0064  | 472.2667 | 472.2687 | 0.002   | 454.2561   |           |            |
| S    | 5 | 611.2701 |          |         | 639.265  |          |         | 621.2545   | 621.2602  | 0.0057     |
| R    | 6 |          |          |         |          |          |         |            |           |            |

**Supplementary Table 28: a and b ions observed for peptide RPAFS(Phospho)R phosphorylated at position S396.**

“Seq.” denotes the residue in the peptide, “#” denotes the number from the beginning of counting fragment ions of that type. A letter shown in red denotes an assigned phosphosite. “a/b/y calc.” denotes the calculated m/z for the corresponding a/b/y ion. “a/b/y obs.” denotes the observed m/z for the ion, if observed. If a species is not observed the corresponding obs. cell will be empty. “a/b/y delta” denotes the deviation (in m/z) between the calculated and observed species. “b/y++” denotes double charged fragment ions, if not specified fragment ions are single charged. b-18 denotes an ion which has lost a water molecule. For clarity modifications are not explicitly listed in the “Seq” column, but explicitly stated in the table title.

| Seq. | y calc.  | y obs.   |        | # |
|------|----------|----------|--------|---|
| R    |          |          |        | 6 |
| P    | 657.2756 |          |        | 5 |
| A    | 560.2228 |          |        | 4 |
| F    | 489.1857 |          |        | 3 |
| S    | 342.1173 | 342.1222 | 0.0049 | 2 |
| R    | 175.119  | 175.1213 | 0.0023 | 1 |

**Supplementary Table 29: y ions observed for peptide RPAFS(Phospho)R phosphorylated at position S396.**

“Seq.” denotes the residue in the peptide, “#” denotes the number from the beginning of counting fragment ions of that type. A letter shown in red denotes an assigned phosphosite. “a/b/y calc.” denotes the calculated m/z for the corresponding a/b/y ion. “a/b/y obs.” denotes the observed m/z for the ion, if observed. If a species is not observed the corresponding obs. cell will be empty. “a/b/y delta” denotes the deviation (in m/z) between the calculated and observed species. “b/y++” denotes double charged fragment ions, if not specified fragment ions are single charged. b-18 denotes an ion which has lost a water molecule. For clarity modifications are not explicitly listed in the “Seq” column, but explicitly stated in the table title.

| Seq. | #  | b calc.   | b obs.   | b delta |
|------|----|-----------|----------|---------|
| K    | 1  | 129.1022  |          |         |
| A    | 2  | 200.1393  | 200.1416 | 0.0023  |
| D    | 3  | 315.1663  | 315.1695 | 0.0032  |
| S    | 4  | 482.1646  |          |         |
| V    | 5  | 581.2331  | 581.2353 | 0.0022  |
| S    | 6  | 748.2314  | 748.2365 | 0.0051  |
| S    | 7  | 915.2298  |          |         |
| N    | 8  | 1029.2727 |          |         |
| H    | 9  | 1166.3316 |          |         |
| T    | 10 | 1267.3793 |          |         |
| L    | 11 | 1380.4634 |          |         |
| S    | 12 | 1467.4954 |          |         |
| S    | 13 | 1554.5274 |          |         |
| N    | 14 | 1668.5703 |          |         |
| A    | 15 | 1739.6075 |          |         |
| T    | 16 | 1840.6551 |          |         |
| R    | 17 |           |          |         |

**Supplementary Table 30: a and b ions observed for peptide KADS(Phospho)VS(Phospho)S(Phospho)**

**NHTLSSNATR phosphorylated at positions S401, S403, S404.**

“Seq.” denotes the residue in the peptide, “#” denotes the number from the beginning of counting fragment ions of that type. A letter shown in red denotes an assigned phosphosite. “a/b/y calc.” denotes the calculated m/z for the corresponding a/b/y ion. “a/b/y obs.” denotes the observed m/z for the ion, if observed. If a species is not observed the corresponding obs. cell will be empty. “a/b/y delta” denotes the deviation (in m/z) between the calculated and observed species. “b/y++” denotes double charged fragment ions, if not specified fragment ions are single charged. b-18 denotes an ion which has lost a water molecule. For clarity modifications are not explicitly listed in the “Seq” column, but explicitly stated in the table title.

| Seq. | y calc.   | y obs.   | y delta | y++ calc. | y++ obs. | y++ delta | #  |
|------|-----------|----------|---------|-----------|----------|-----------|----|
| K    |           |          |         |           |          |           | 17 |
| A    | 1886.6719 |          |         | 943.8396  |          |           | 16 |
| D    | 1815.6347 |          |         | 908.321   |          |           | 15 |
| S    | 1700.6078 |          |         | 850.8075  |          |           | 14 |
| V    | 1533.6094 |          |         | 767.3084  | 767.2994 | -0.009    | 13 |
| S    | 1434.541  |          |         | 717.7742  |          |           | 12 |
| S    | 1267.5427 |          |         | 634.275   |          |           | 11 |
| N    | 1100.5443 |          |         | 550.7758  |          |           | 10 |
| H    | 986.5014  |          |         | 493.7543  |          |           | 9  |
| T    | 849.4425  | 849.4508 | 0.0083  | 425.2249  |          |           | 8  |
| L    | 748.3948  | 748.4012 | 0.0064  | 374.701   |          |           | 7  |
| S    | 635.3107  | 635.3228 | 0.0121  | 318.159   |          |           | 6  |
| S    | 548.2787  | 548.2821 | 0.0034  | 274.643   |          |           | 5  |
| N    | 461.2467  | 461.2558 | 0.0091  | 231.127   |          |           | 4  |
| A    | 347.2037  | 347.1949 | -0.0088 | 174.1055  |          |           | 3  |
| T    | 276.1666  |          |         | 138.587   |          |           | 2  |
| R    | 175.119   |          |         | 88.0631   |          |           | 1  |

**Supplementary Table 31: y ions observed for peptide KADS(Phospho)VS(Phospho)S(Phospho)NHTLSSNATR phosphorylated at positions S401, S403, S404.**

“Seq.” denotes the residue in the peptide, “#” denotes the number from the beginning of counting fragment ions of that type. A letter shown in red denotes an assigned phosphosite. “a/b/y calc.” denotes the calculated m/z for the corresponding a/b/y ion. “a/b/y obs.” denotes the observed m/z for the ion, if observed. If a species is not observed the corresponding obs. cell will be empty. “a/b/y delta” denotes the deviation (in m/z) between the calculated and observed species. “b/y++” denotes double charged fragment ions, if not specified fragment ions are single charged. b-18 denotes an ion which has lost a water molecule. For clarity modifications are not explicitly listed in the “Seq” column, but explicitly stated in the table title.



| Seq. | #  | a calc.   | a obs.   | a delta | b calc.   | b obs.   | b delta | b-18 calc. | b-18 obs. | b-18 delta |
|------|----|-----------|----------|---------|-----------|----------|---------|------------|-----------|------------|
| K    | 1  | 101.1073  |          |         | 129.1022  |          |         | 111.0917   |           |            |
| A    | 2  | 172.1444  |          |         | 200.1393  |          |         | 182.1288   |           |            |
| D    | 3  | 287.1714  |          |         | 315.1663  | 315.1667 | 0.0004  | 297.1557   |           |            |
| S    | 4  | 454.1697  |          |         | 482.1646  |          |         | 464.1541   | 464.1435  | -0.0106    |
| V    | 5  | 553.2381  |          |         | 581.2331  | 581.2408 | 0.0077  | 563.2225   |           |            |
| S    | 6  | 640.2702  |          |         | 668.2651  | 668.2877 | 0.0226  | 650.2545   |           |            |
| S    | 7  | 807.2685  |          |         | 835.2634  |          |         | 817.2529   | 817.271   | 0.0182     |
| N    | 8  | 921.3115  | 921.2792 | -0.0323 | 949.3064  |          |         | 931.2958   | 931.3236  | 0.0277     |
| H    | 9  | 1058.3704 |          |         | 1086.3653 |          |         | 1068.3547  |           |            |
| T    | 10 | 1239.3844 |          |         | 1267.3793 |          |         | 1249.3687  |           |            |
| L    | 11 | 1352.4684 |          |         | 1380.4634 |          |         | 1362.4528  |           |            |
| S    | 12 | 1439.5005 |          |         | 1467.4954 |          |         | 1449.4848  |           |            |
| S    | 13 | 1526.5325 |          |         | 1554.5274 |          |         | 1536.5169  |           |            |
| N    | 14 | 1640.5754 |          |         | 1668.5703 |          |         | 1650.5598  |           |            |
| A    | 15 | 1711.6125 |          |         | 1739.6075 |          |         | 1721.5969  |           |            |
| T    | 16 | 1812.6602 |          |         | 1840.6551 |          |         | 1822.6446  |           |            |
| R    | 17 |           |          |         |           |          |         |            |           |            |

**Supplementary Table 32: a and b ions observed for peptide**

**KADS(Phospho)VSS(Phospho)NHT(Phospho)LSSNATR phosphorylated at positions S401, S404, T407.**

“Seq.” denotes the residue in the peptide, “#” denotes the number from the beginning of counting fragment ions of that type. A letter shown in red denotes an assigned phosphosite. “a/b/y calc.” denotes the calculated m/z for the corresponding a/b/y ion. “a/b/y obs.” denotes the observed m/z for the ion, if observed. If a species is not observed the corresponding obs. cell will be empty. “a/b/y delta” denotes the deviation (in m/z) between the calculated and observed species. “b/y++” denotes double charged fragment ions, if not specified fragment ions are single charged. b-18 denotes an ion which has lost a water molecule. For clarity modifications are not explicitly listed in the “Seq” column, but explicitly stated in the table title.

| Seq. | y calc.   | y obs.   | y delta | #  |
|------|-----------|----------|---------|----|
| K    |           |          |         | 1  |
| A    | 1886.6719 |          |         | 2  |
| D    | 1815.6347 |          |         | 3  |
| S    | 1700.6078 |          |         | 4  |
| V    | 1533.6094 |          |         | 5  |
| S    | 1434.541  |          |         | 6  |
| S    | 1347.509  |          |         | 7  |
| N    | 1180.5106 |          |         | 8  |
| H    | 1066.4677 |          |         | 9  |
| T    | 929.4088  |          |         | 10 |
| L    | 748.3948  | 748.3926 | -0.0022 | 11 |
| S    | 635.3107  | 635.3201 | 0.0094  | 12 |
| S    | 548.2787  | 548.2857 | 0.007   | 13 |
| N    | 461.2467  |          |         | 14 |
| A    | 347.2037  |          |         | 15 |
| T    | 276.1666  |          |         | 16 |
| R    | 175.119   | 175.1204 | 0.0015  | 17 |

**Supplementary Table 33: y ions observed for peptide KADS(Phospho)VSS(Phospho)NHT(Phospho)LSSNATR phosphorylated at positions S401, S404, T407.**

“Seq.” denotes the residue in the peptide, “#” denotes the number from the beginning of counting fragment ions of that type. A letter shown in red denotes an assigned phosphosite. “a/b/y calc.” denotes the calculated m/z for the corresponding a/b/y ion. “a/b/y obs.” denotes the observed m/z for the ion, if observed. If a species is not observed the corresponding obs. cell will be empty. “a/b/y delta” denotes the deviation (in m/z) between the calculated and observed species. “b/y++” denotes double charged fragment ions, if not specified fragment ions are single charged. b-18 denotes an ion which has lost a water molecule. For clarity modifications are not explicitly listed in the “Seq” column, but explicitly stated in the table title.

| Seq. | #  | a calc.   | a obs.   | a delta | b calc.   | b obs.    | b delta |
|------|----|-----------|----------|---------|-----------|-----------|---------|
| K    | 1  | 101.1073  |          |         | 129.1022  |           |         |
| A    | 2  | 172.1444  |          |         | 200.1393  | 200.1415  | 0.0022  |
| D    | 3  | 287.1714  | 287.1777 | 0.0063  | 315.1663  | 315.1661  | -0.0002 |
| S    | 4  | 374.2034  |          |         | 402.1983  |           |         |
| V    | 5  | 473.2718  |          |         | 501.2667  |           |         |
| S    | 6  | 560.3038  |          |         | 588.2988  |           |         |
| S    | 7  | 647.3359  |          |         | 675.3308  |           |         |
| N    | 8  | 761.3788  |          |         | 789.3737  | 789.3704  | -0.0033 |
| H    | 9  | 898.4377  | 898.4133 | -0.0244 | 926.4326  |           |         |
| T    | 10 | 999.4854  |          |         | 1027.4803 |           |         |
| L    | 11 | 1112.5695 |          |         | 1140.5644 |           |         |
| S    | 12 | 1199.6015 |          |         | 1227.5964 |           |         |
| S    | 13 | 1286.6335 |          |         | 1314.6284 | 1314.6677 | 0.0392  |
| N    | 14 | 1401.6605 |          |         | 1429.6554 | 1429.6553 | 0       |
| A    | 15 | 1472.6976 |          |         | 1500.6925 |           |         |
| T    | 16 | 1653.7116 |          |         | 1681.7065 |           |         |
| R    | 17 |           |          |         |           |           |         |

**Supplementary Table 34: a and b ions observed for peptide KADSVSSNHTLSSN(deamidated)AT(Phospho)R phosphorylated at position T416.**

“Seq.” denotes the residue in the peptide, “#” denotes the number from the beginning of counting fragment ions of that type. A letter shown in red denotes an assigned phosphosite. “a/b/y calc.” denotes the calculated m/z for the corresponding a/b/y ion. “a/b/y obs.” denotes the observed m/z for the ion, if observed. If a species is not observed the corresponding obs. cell will be empty. “a/b/y delta” denotes the deviation (in m/z) between the calculated and observed species. “b/y++” denotes double charged fragment ions, if not specified fragment ions are single charged. b-18 denotes an ion which has lost a water molecule. For clarity modifications are not explicitly listed in the “Seq” column, but explicitly stated in the table title.

| Seq. | y calc.   | y obs.    | y delta | y++ calc. | y++ obs. | y++ delta | #  |
|------|-----------|-----------|---------|-----------|----------|-----------|----|
| K    |           |           |         |           |          |           | 1  |
| A    | 1727.7232 |           |         | 864.3652  |          |           | 2  |
| D    | 1656.6861 |           |         | 828.8467  |          |           | 3  |
| S    | 1541.6592 |           |         | 771.3332  | 771.3499 | 0.0166    | 4  |
| V    | 1454.6271 |           |         | 727.8172  |          |           | 5  |
| S    | 1355.5587 |           |         | 678.283   |          |           | 6  |
| S    | 1268.5267 |           |         | 634.767   |          |           | 7  |
| N    | 1181.4947 |           |         | 591.251   |          |           | 8  |
| H    | 1067.4517 | 1067.4101 | -0.0416 | 534.2295  |          |           | 9  |
| T    | 930.3928  | 930.4199  | 0.0271  | 465.7     |          |           | 10 |
| L    | 829.3451  | 829.3625  | 0.0173  | 415.1762  |          |           | 11 |
| S    | 716.2611  |           |         | 358.6342  |          |           | 12 |
| S    | 629.229   |           |         | 315.1182  |          |           | 13 |
| N    | 542.197   |           |         | 271.6021  |          |           | 14 |
| A    | 427.1701  |           |         | 214.0887  |          |           | 15 |
| T    | 356.133   |           |         | 178.5701  |          |           | 16 |
| R    | 175.119   | 175.1233  | 0.0043  | 88.0631   |          |           | 17 |

**Supplementary Table 35: y ions observed for peptide KADSVSSNHTLSSN(deamidated)AT(Phospho)R**

**phosphorylated at position T416.**

“Seq.” denotes the residue in the peptide, “#” denotes the number from the beginning of counting fragment ions of that type. A letter shown in red denotes an assigned phosphosite. “a/b/y calc.” denotes the calculated m/z for the corresponding a/b/y ion. “a/b/y obs.” denotes the observed m/z for the ion, if observed. If a species is not observed the corresponding obs. cell will be empty. “a/b/y delta” denotes the deviation (in m/z) between the calculated and observed species. “b/y++” denotes double charged fragment ions, if not specified fragment ions are single charged. b-18 denotes an ion which has lost a water molecule. For clarity modifications are not explicitly listed in the “Seq” column, but explicitly stated in the table title.

| Seq. | #  | b calc.   | b obs.   | b delta | b-18 calc. | b-18 obs. | b-18 delta |
|------|----|-----------|----------|---------|------------|-----------|------------|
| A    | 1  | 72.0444   |          |         | 54.0338    |           |            |
| D    | 2  | 187.0713  | 187.0725 | 0.0012  | 169.0608   | 169.0618  | 0.0011     |
| S    | 3  | 274.1034  |          |         | 256.0928   |           |            |
| V    | 4  | 373.1718  |          |         | 355.1612   |           |            |
| S    | 5  | 540.1701  |          |         | 522.1596   |           |            |
| S    | 6  | 627.2022  |          |         | 609.1916   |           |            |
| N    | 7  | 741.2451  |          |         | 723.2345   |           |            |
| H    | 8  | 878.304   | 878.2988 | -0.0052 | 860.2934   |           |            |
| T    | 9  | 979.3517  |          |         | 961.3411   |           |            |
| L    | 10 | 1092.4357 |          |         | 1074.4252  |           |            |
| S    | 11 | 1179.4678 | 1179.471 | 0.0032  | 1161.4572  |           |            |
| S    | 12 | 1266.4998 |          |         | 1248.4892  |           |            |
| N    | 13 | 1380.5427 |          |         | 1362.5322  |           |            |
| A    | 14 | 1451.5798 |          |         | 1433.5693  |           |            |
| T    | 15 | 1552.6275 |          |         | 1534.617   |           |            |
| R    | 16 |           |          |         |            |           |            |

**Supplementary Table 36: a and b ions observed for peptide KADSVS(Phospho)SNHTLSSNATR phosphorylated at position T403.**

“Seq.” denotes the residue in the peptide, “#” denotes the number from the beginning of counting fragment ions of that type. A letter shown in red denotes an assigned phosphosite. “a/b/y calc.” denotes the calculated m/z for the corresponding a/b/y ion. “a/b/y obs.” denotes the observed m/z for the ion, if observed. If a species is not observed the corresponding obs. cell will be empty. “a/b/y delta” denotes the deviation (in m/z) between the calculated and observed species. “b/y++” denotes double charged fragment ions, if not specified fragment ions are single charged. b-18 denotes an ion which has lost a water molecule. For clarity modifications are not explicitly listed in the “Seq” column, but explicitly stated in the table title.

| Seq. | y calc.   | y obs.   | y delta | #  |
|------|-----------|----------|---------|----|
| A    |           |          |         | 16 |
| D    | 1655.7021 |          |         | 15 |
| S    | 1540.6751 |          |         | 14 |
| V    | 1453.6431 |          |         | 13 |
| S    | 1354.5747 |          |         | 12 |
| S    | 1187.5763 |          |         | 11 |
| N    | 1100.5443 |          |         | 10 |
| H    | 986.5014  | 986.5099 | 0.0085  | 9  |
| T    | 849.4425  | 849.4485 | 0.006   | 8  |
| L    | 748.3948  | 748.4065 | 0.0117  | 7  |
| S    | 635.3107  | 635.3124 | 0.0017  | 6  |
| S    | 548.2787  | 548.2701 | -0.0086 | 5  |
| N    | 461.2467  | 461.2631 | 0.0164  | 4  |
| A    | 347.2037  |          |         | 3  |
| T    | 276.1666  |          |         | 2  |
| R    | 175.119   | 175.1221 | 0.0031  | 1  |

**Supplementary Table 37: y ions observed for peptide KADSVS(Phospho)SNHTLSSNATR phosphorylated at position**

**T403.**

“Seq.” denotes the residue in the peptide, “#” denotes the number from the beginning of counting fragment ions of that type. A letter shown in red denotes an assigned phosphosite. “a/b/y calc.” denotes the calculated m/z for the corresponding a/b/y ion. “a/b/y obs.” denotes the observed m/z for the ion, if observed. If a species is not observed the corresponding obs. cell will be empty. “a/b/y delta” denotes the deviation (in m/z) between the calculated and observed species. “b/y++” denotes double charged fragment ions, if not specified fragment ions are single charged. b-18 denotes an ion which has lost a water molecule. For clarity modifications are not explicitly listed in the “Seq” column, but explicitly stated in the table title.

| Seq. | #  | a calc.   | a obs.   | a delta | b calc.   | b obs.    | b delta | b-18 calc. | b-18 obs. | b-18 delta |
|------|----|-----------|----------|---------|-----------|-----------|---------|------------|-----------|------------|
| A    | 1  | 44.0495   |          |         | 72.0444   |           |         | 54.0338    |           |            |
| D    | 2  | 159.0764  |          |         | 187.0713  |           |         | 169.0608   |           |            |
| S    | 3  | 246.1084  | 246.1119 | 0.0035  | 274.1034  |           |         | 256.0928   | 256.0952  | 0.0024     |
| V    | 4  | 345.1769  |          |         | 373.1718  |           |         | 355.1612   | 355.1633  | 0.0021     |
| S    | 5  | 432.2089  |          |         | 460.2038  |           |         | 442.1932   | 442.2038  | 0.0106     |
| S    | 6  | 519.2409  |          |         | 547.2358  |           |         | 529.2253   | 529.2241  | -0.0012    |
| N    | 7  | 633.2838  |          |         | 661.2788  | 661.2918  | 0.0131  | 643.2682   | 643.269   | 0.0008     |
| H    | 8  | 770.3428  | 770.3538 | 0.011   | 798.3377  | 798.3461  | 0.0085  | 780.3271   | 780.3277  | 0.0006     |
| T    | 9  | 951.3568  |          |         | 979.3517  | 979.3701  | 0.0185  | 961.3411   |           |            |
| L    | 10 | 1064.4408 |          |         | 1092.4357 | 1092.4633 | 0.0276  | 1074.4252  |           |            |
| S    | 11 | 1151.4729 |          |         | 1179.4678 |           |         | 1161.4572  |           |            |
| S    | 12 | 1238.5049 |          |         | 1266.4998 |           |         | 1248.4892  |           |            |
| N    | 13 | 1352.5478 |          |         | 1380.5427 |           |         | 1362.5322  |           |            |
| A    | 14 | 1423.5849 |          |         | 1451.5798 |           |         | 1433.5693  |           |            |
| T    | 15 | 1524.6326 |          |         | 1552.6275 |           |         | 1534.617   |           |            |
| R    | 16 |           |          |         |           |           |         |            |           |            |

**Supplementary Table 38: a and b ions observed for peptide ADSVSSNHT(Phospho)LSSNATR phosphorylated at position T407.**

“Seq.” denotes the residue in the peptide, “#” denotes the number from the beginning of counting fragment ions of that type. A letter shown in red denotes an assigned phosphosite. “a/b/y calc.” denotes the calculated m/z for the corresponding a/b/y ion. “a/b/y obs.” denotes the observed m/z for the ion, if observed. If a species is not observed the corresponding obs. cell will be empty. “a/b/y delta” denotes the deviation (in m/z) between the calculated and observed species. “b/y++” denotes double charged fragment ions, if not specified fragment ions are single charged. b-18 denotes an ion which has lost a water molecule. For clarity modifications are not explicitly listed in the “Seq” column, but explicitly stated in the table title.

| Seq. | y calc.   | y obs.    | y delta | y++ calc. | y++ obs. | y++ delta | #  |
|------|-----------|-----------|---------|-----------|----------|-----------|----|
| A    |           |           |         |           |          |           | 16 |
| D    | 1655.7021 |           |         | 828.3547  |          |           | 15 |
| S    | 1540.6751 |           |         | 770.8412  | 770.8494 | 0.0082    | 14 |
| V    | 1453.6431 |           |         | 727.3252  |          |           | 13 |
| S    | 1354.5747 |           |         | 677.791   | 677.8058 | 0.0148    | 12 |
| S    | 1267.5427 |           |         | 634.275   | 634.2796 | 0.0046    | 11 |
| N    | 1180.5106 | 1180.5476 | 0.037   | 590.759   |          |           | 10 |
| H    | 1066.4677 | 1066.4948 | 0.027   | 533.7375  |          |           | 9  |
| T    | 929.4088  | 929.4319  | 0.0231  | 465.208   |          |           | 8  |
| L    | 748.3948  | 748.4001  | 0.0053  | 374.701   |          |           | 7  |
| S    | 635.3107  | 635.3173  | 0.0066  | 318.159   |          |           | 6  |
| S    | 548.2787  | 548.2837  | 0.005   | 274.643   |          |           | 5  |
| N    | 461.2467  | 461.2489  | 0.0022  | 231.127   |          |           | 4  |
| A    | 347.2037  |           |         | 174.1055  |          |           | 3  |
| T    | 276.1666  |           |         | 138.587   |          |           | 2  |
| R    | 175.119   | 175.1185  | -0.0004 | 88.0631   |          |           | 1  |

**Supplementary Table 39: y ions observed for peptide ADSVSSNHT(Phospho)LSSNATR phosphorylated at position T407.**

“Seq.” denotes the residue in the peptide, “#” denotes the number from the beginning of counting fragment ions of that type. A letter shown in red denotes an assigned phosphosite. “a/b/y calc.” denotes the calculated m/z for the corresponding a/b/y ion. “a/b/y obs.” denotes the observed m/z for the ion, if observed. If a species is not observed the corresponding obs. cell will be empty. “a/b/y delta” denotes the deviation (in m/z) between the calculated and observed species. “b/y++” denotes double charged fragment ions, if not specified fragment ions are single charged. b-18 denotes an ion which has lost a water molecule. For clarity modifications are not explicitly listed in the “Seq” column, but explicitly stated in the table title.
